1 **Environmental conditions dictate differential evolution of vancomycin resistance**  
2 **in *Staphylococcus aureus***

3

4

5 Henrique Machado<sup>a</sup>, Yara Seif<sup>a</sup>, George Sakoulas<sup>b</sup>, Connor A. Olson<sup>a</sup>, Richard Szubin<sup>a</sup>,  
6 Bernhard O. Palsson<sup>a,b,c</sup>, Victor Nizet<sup>b,c</sup>, Adam M. Feist<sup>a,d,\*</sup>

7

8

9 <sup>a</sup> Department of Bioengineering, University of California San Diego, La Jolla, California,  
10 USA

11 <sup>b</sup> Collaborative to Halt Antibiotic-Resistant Microbes, Department of Pediatrics,  
12 University of California San Diego, La Jolla, California, USA

13 <sup>c</sup> Skaggs School of Pharmacy and Pharmaceutical Sciences, University of California  
14 San Diego, La Jolla, California, USA

15 <sup>d</sup> Novo Nordisk Foundation Center for Biosustainability, Technical University of  
16 Denmark, Lyngby, Denmark

17

18 **Running title:** *S. aureus*' vancomycin resistant mechanisms

19 \*Address correspondence to Adam M. Feist, [afeist@ucsd.edu](mailto:afeist@ucsd.edu).

20 **Keywords:** adaptive laboratory evolution, *Staphylococcus aureus*, antibiotic resistance,  
21 vancomycin, USA300, resistance mechanism, MRSA

22

## 23 **Abstract**

24 While microbiological resistance to vancomycin in *Staphylococcus aureus* is rare, clinical  
25 vancomycin treatment failures are common, and methicillin-resistant *S. aureus* (MRSA)  
26 strains isolated from patients after prolonged vancomycin treatment failure remain  
27 susceptible. Adaptive laboratory evolution was utilized to uncover mutational  
28 mechanisms associated with MRSA vancomycin resistance in a bacteriological medium  
29 used in clinical susceptibility testing and a physiological medium. Sequencing of resistant  
30 clones revealed shared and media-specific mutational outcomes, with an overlap in cell  
31 wall regulons (*walKRyycHI*, *vraSRT*). Evolved strains displayed similar genetic and  
32 phenotypic traits to resistant clinical isolates. Importantly, resistant phenotypes that  
33 developed in physiological media did not translate into resistance in bacteriological  
34 media. Further, a bacteriological media-specific mechanism for vancomycin resistance  
35 enabled by a mutated *mprF* was confirmed. This study bridges the gap of understanding  
36 between clinical and microbiological vancomycin resistance in *S. aureus* and expands the  
37 number of allelic variants that result in vancomycin resistance phenotypes.

## 38 **Introduction**

39 Antibiotic resistance is a global healthcare threat worldwide (Organization, 2014; (u.s.)  
40 and Centers for Disease Control and Prevention (U.S.), 2019). Consequently, numerous  
41 strategies have been developed and implemented to monitor, assess, and circumvent the  
42 development of antibiotic resistance among pathogens (Alcock et al., 2020; Martens and  
43 Demain, 2017; Pollack and Srinivasan, 2014). Continual monitoring and assessment are  
44 key to getting a global picture of the problem and increasing our understanding of the  
45 mutational mechanisms that pathogens employ towards resistance development.

46 Although somewhat successful, current monitoring and assessment approaches  
47 are based on existing pathogen-specific knowledge. Because mechanisms for antibiotic  
48 resistance evolution are poorly defined, full realization of critical threats often occurs only  
49 after resistance has emerged. Importantly, the evaluation of allelic variations known to  
50 lead to reduced susceptibility to a given antibiotic do not account for all the other variations  
51 of that same allele or variation in other alleles that can result in the same phenotype  
52 (Mitsakakis et al., 2018). Furthermore, bacterial susceptibility to antibiotics is measured  
53 following guidelines of the Clinical & Laboratory Standards Institute (CLSI), which  
54 recommend using the bacteriological rich media cation-adjusted Mueller-Hinton broth  
55 (CA-MHB) to determine antibiotic susceptibility. CA-MHB was specifically developed for  
56 its ability to reliably support the cultivation of common human pathogens from clinical  
57 samples, and only later adopted for minimum inhibitory/bactericidal concentration  
58 (MIC/MBC) testing of antibiotic candidates. However, CA-MHB does not come close to  
59 recapitulating the environment encountered by bacteria *in vivo* and has been shown to  
60 be less reliable in predicting *in vivo* activity of antibiotics than other more physiological

61 media such as mammalian tissue culture media (Ersoy et al., 2017; Farha et al., 2018;  
62 Kumaraswamy et al., 2016). Adaptive laboratory evolution (ALE) is a strategy that allows  
63 the investigator to address both the issues of limited coverage of allelic variation and  
64 environment-specific susceptibility through the study of identification of causal mutational  
65 mechanisms(Dragosits and Mattanovich, 2013; Mohamed et al., 2017; Salazar et al.,  
66 2020). ALE leverages microbial growth under different environments and conditions,  
67 wherein the natural mutation rate of bacteria can be exploited to sample successful allelic  
68 variations.

69  
70 *Staphylococcus aureus* is a historical example of the successful development of  
71 antibiotic resistance by a common human pathogen, with methicillin-resistant strains  
72 (MRSA) presenting significant treatment challenges (Howden et al., 2010; Mwangi et al.,  
73 2007; Pader et al., 2016). The most commonly recommended drug for the treatment of  
74 MRSA infections is the glycopeptide vancomycin (Sorrell et al., 1982). Even though very  
75 few vancomycin-resistant MRSA clinical isolates have been reported (Hidayat et al.,  
76 2006; Hiramatsu et al., 1997; Howe et al., 1998), an increasing challenge of clinical  
77 treatment failures is well documented (Howden et al., 2010). The established MIC  
78 breakpoints determined by CLSI classify *S. aureus* into three susceptibility categories:  
79 vancomycin-susceptible *S. aureus* (VSSA, MIC  $\leq$  2  $\mu$ g/mL), vancomycin intermediate-  
80 resistant *S. aureus* (VISA, MIC = 4-8  $\mu$ g/mL), and vancomycin-resistant *S. aureus* (VRSA,  
81 MIC  $\geq$  16  $\mu$ g/mL).

82 Here we used a clinical MRSA isolate (TCH1516) and applied adaptive laboratory  
83 evolution to uncover mutational mechanisms associated with resistance under two

84 different environmental conditions: (i) CA-MHB, the nutrient rich bacteriological medium  
85 used for clinical susceptibility testing by CLSI recommendations; and (ii) Roswell Park  
86 Memorial Institute medium (RPMI), a mammalian cell culture medium that better mimics  
87 human physiology (McKee and Komarova, 2017). We further phenotypically  
88 characterized several vancomycin-tolerant and -resistant clones and identified genetic  
89 mutations responsible for such adaptations. The mutational evolutionary pathways  
90 towards vancomycin tolerance exhibited media specificity, with an overlap in regulatory  
91 rearrangements in cell wall regulons. We also establish that vancomycin-resistant  
92 phenotypes that developed in physiological media do not translate into resistance in  
93 bacteriological media, where a major resistance mechanism relies on change of the cell  
94 surface charge by mutation of *mprF*. This study significantly expands knowledge of allelic  
95 variation that contributes to *S. aureus* vancomycin tolerance.

## 96 **Results**

97 **Tolerization of *S. aureus* TCH1516 to vancomycin.** Adaptive Laboratory Evolution  
98 (ALE) relies on the natural capability of cells to adapt to new environments. Here, we  
99 have applied this technology to engender tolerance of *S. aureus* TCH1516 to vancomycin,  
100 and unravel the molecular mechanisms for this adaptation, in a so-called Tolerization ALE  
101 (TALE) (Mohamed et al., 2017; Salazar et al., 2020). Two media types were used in this  
102 experiment: CA-MHB, an undefined defined nutrient rich bacteriological medium used for  
103 clinical susceptibility testing and the well-defined Roswell Park Memorial Institute medium  
104 (RPMI), routinely used in the culturing of mammalian cells, and which resembles the  
105 physiological conditions in the human body (McKee and Komarova, 2017), supplemented  
106 with 10% bacteriological rich Luria-Bertani medium (RPMI+) to ensure bacterial growth  
107 equivalency. For each media type, four replicates of wild-type (WT) and of two media-  
108 adapted clones were evolved to stepwise increasing concentrations of vancomycin  
109 (Figure 1A). The TALE experiments were conducted for ~30 days and  $\sim 5 \times 10^{12}$  cumulative  
110 cell divisions (CCDs). The final vancomycin concentrations reached an average of  $5.14 \pm$   
111  $0.46 \mu\text{g/mL}$  in CA-MHB and  $6.13 \pm 1.03 \mu\text{g/mL}$  in RPMI+ (Figure 1B), compared to a tenth  
112 of the MIC used as start concentration (MIC in Supplementary Table 1; starting  
113 concentration of 0.1 and 0.2  $\mu\text{g/mL}$ , in CA-MHB and RPMI+ TALEs, respectively).

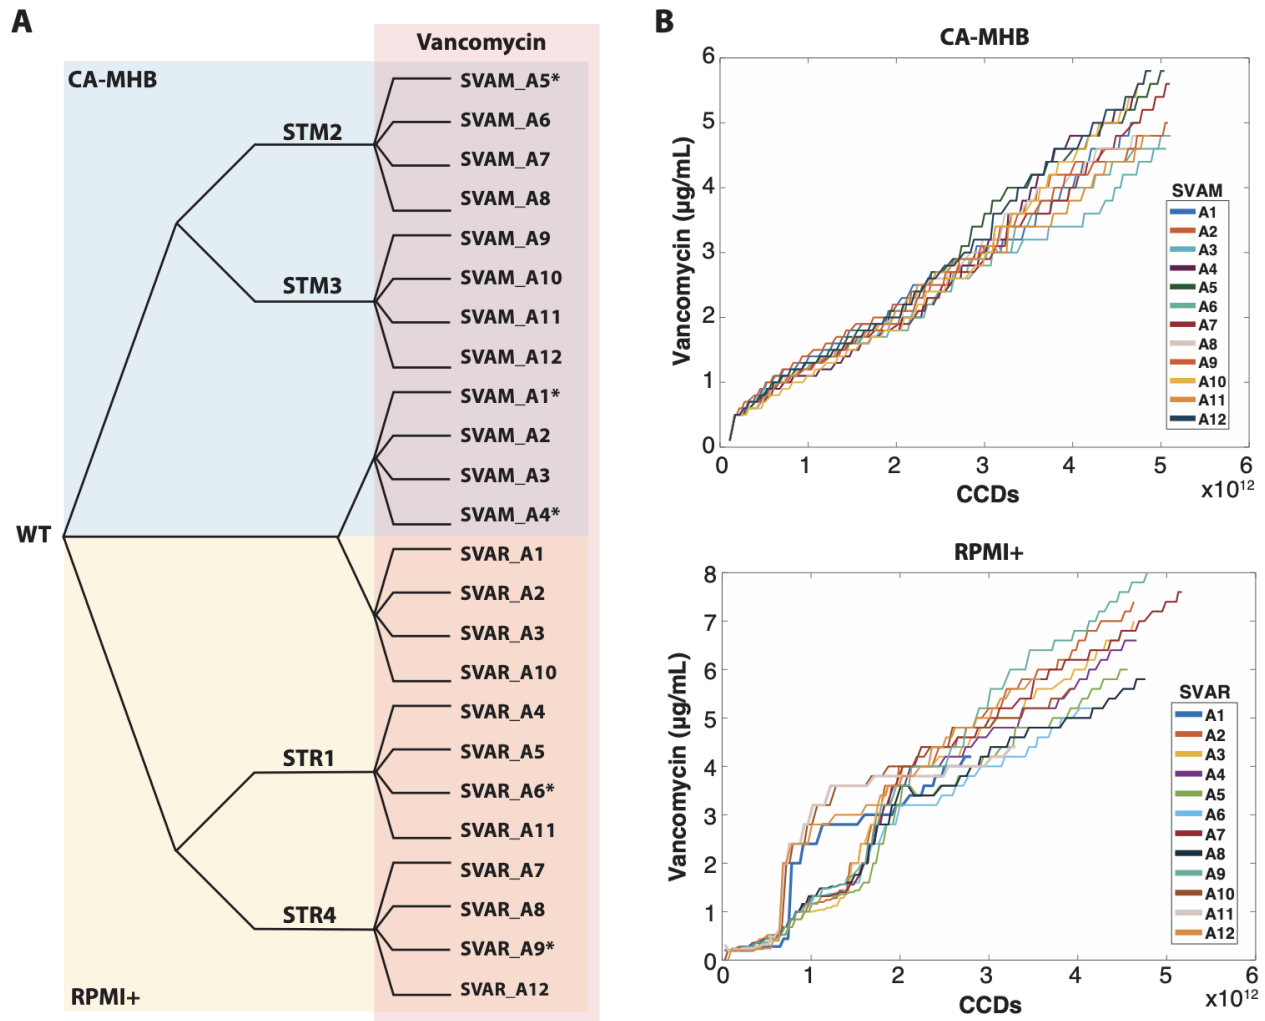

114

115 **Figure 1.** Tolerization Adaptive Laboratory Evolution. (A) Experimental design. Wild-  
 116 type (WT) *S. aureus* TCH1516 was used as starting strain along with strains which were  
 117 initially adapted to each media condition (Salazar et al., 2020). Strains were tolerized  
 118 under CA-MHB (blue) and RPMI+ (yellow) media conditions with increasing  
 119 concentrations of vancomycin (red). Isolate naming from each lineage is listed. (B) Plots  
 120 showing the stepwise increase of vancomycin throughout the TALE experiments. \*  
 121 denotes hyper-mutators. STM: *Staphylococcus aureus* adapted to CA-MHB. STR:  
 122 *Staphylococcus aureus* adapted to RPMI+.

123 vancomycin in CA-MHB. SVAR: *Staphylococcus aureus* tolerized to vancomycin in  
124 RPMI+. CCDs: cumulative cell divisions.

125

126 **Phenotypes and tradeoffs in vancomycin tolerization.** The TALE evolved strains,  
127 adapted for growth in increasing concentrations of vancomycin, were evaluated for  
128 changes to their growth phenotypes and antibiotic susceptibility. Growth rate was not  
129 affected in TALE strains, but an increase in the lag phase could be identified in CA-MHB-  
130 evolved strains when measured with no vancomycin stress and compared to their pre-  
131 evolved counterparts (Figure 2A). As expected, TALE strains grew in higher  
132 concentrations of vancomycin, with an increase in MIC of up to 8-fold (Supplementary  
133 Table 1). Previous studies have outlined the phenotypic characteristics of clinically  
134 isolated vancomycin-tolerant strains (Howden et al., 2010; Ishii et al., 2015). We observed  
135 similar characteristics in the TALE-evolved strains, including lower hemolytic activity and  
136 reduced autolysis (Supplementary Figure 1A and 1B). Further, vancomycin-tolerant  
137 strains generated in the laboratory have been reported to be phenotypically unstable  
138 (Gardete et al., 2012), losing their tolerance after growth in non-selective conditions.  
139 Therefore, we grew the vancomycin-tolerized strains for  $21.79 \pm 2.08$  passages  
140 ( $9.41 \times 10^{11} \pm 9.84 \times 10^{10}$  CCDs) in the media used for evolution, without vancomycin. The  
141 endpoint strains were generally stable in maintaining their tolerance phenotype in 11 out  
142 of 12 lineages, with the exception of the SVAM\_A10 lineage, which decreased its MIC  
143 from 8 to 2  $\mu\text{g/mL}$  (Supplementary Table 1).

144



145 TALE strains lost vancomycin susceptibility, with a corresponding increase in their  
 146 MIC (Supplementary Table 1). We further assessed if this decrease in susceptibility held  
 147 true across the different media environments. Although CA-MHB vancomycin-tolerized  
 148 strains (i.e., SVAM) maintained their tolerance phenotypes in RPMI+, the same was not  
 149 true for the clones evolved in RPMI+. RPMI+ vancomycin-tolerized strains (i.e., SVAR)  
 150 did not show decreased susceptibility when screened in CA-MHB media (Figure 2B).  
 151 Thus, the strains evolved under RPMI+ displayed a media-specific tolerance phenotype,  
 152 as compared to the translatable phenotype of the CA-MHB derived strains, for the two  
 153 media conditions tested here.  
 154

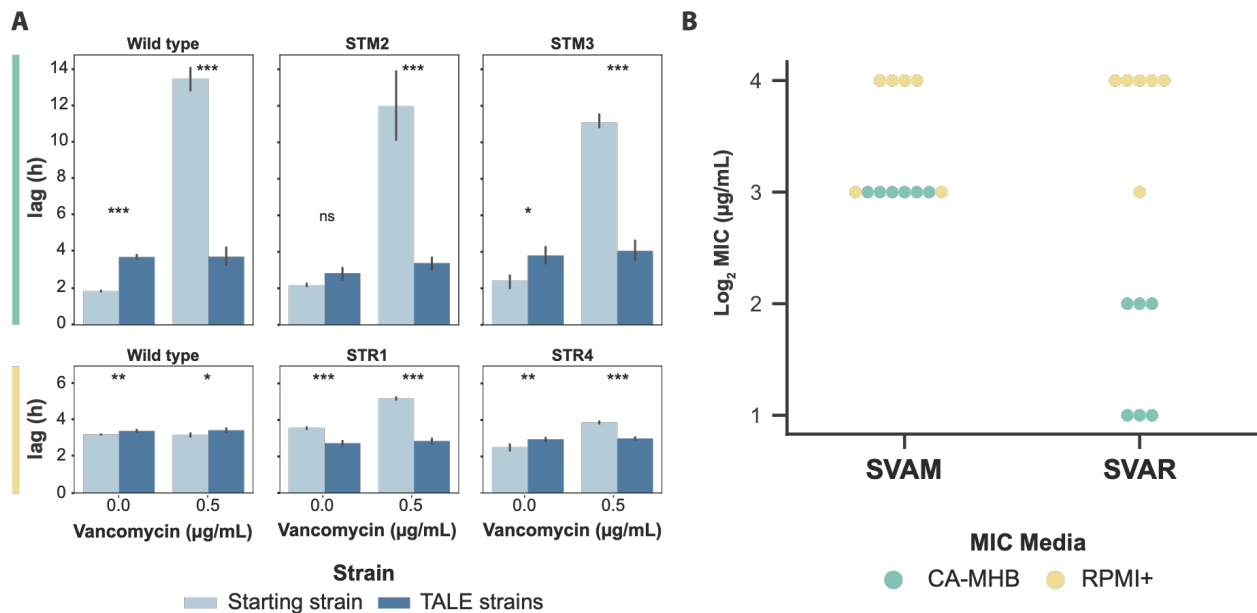

155  
 156 **Figure 2.** Phenotypic changes observed in vancomycin-tolerized strains. (A) Bar plots  
 157 displaying growth trade offs grouped by the starting strain for each set of TALE  
 158 experiments. Evolution starting strains and vancomycin adapted strains were grown in  
 159 the absence and presence of vancomycin. Assessment of the lag-phase duration of  
 160 starting strains and evolved strains in the same media as that used for tolerization, CA-

161 MHB (top, green) and RPMI+ (bottom, yellow). Evolved strain averages used 2, 3 or 4  
162 distinct clones derived from the given starting strain (Supplementary Table 1), all  
163 determinations were made in triplicate. Values that are significantly different by ANOVA  
164 are indicated by asterisks (ns, non-significant; \*,  $P \leq 0.05$ ; \*\*,  $P \leq 0.01$ ; and \*\*\*,  $P \leq$   
165 0.001) (Supplementary Table 2). (B) A plot of  $\text{Log}_2$  vancomycin MIC values of evolved  
166 strains from all TALE conditions tested in both media types. SVAR strain tolerance  
167 phenotypes did not translate when tested for MIC in CA-MHB media. SVAM:  
168 *Staphylococcus aureus* tolerized to vancomycin in CA-MHB. SVAR: *Staphylococcus*  
169 *aureus* tolerized to vancomycin in RPMI+.

170

171

172 **Environment dependent mutational strategies to vancomycin tolerization.** For each  
173 of the 24 independent adaptive evolutionary lineages, 2-3 clones were randomly selected  
174 at different time points of the TALE experiments and were sequenced for mutational  
175 analysis. For each media type, approximately 400 unique mutations could be identified  
176 (462 in CA-MHB and 374 in RPMI+,  $n=50$ ) (Supplementary Tables 3 and 4), with the  
177 majority (approx. 85%) being single nucleotide polymorphisms (SNPs). The percentage  
178 of transitions and transversions was quite similar (55% transitions, 45% transversions),  
179 but there was a bias in mutations from GC to AT, which constituted about 40% of the  
180 SNPs compared to 20% from AT to GC. The observed AT biased mutation has been  
181 shown to be universal for bacteria, independently of their genomic GC content  
182 (Hershberg, 2015; Hershberg and Petrov, 2010; Hildebrand et al., 2010).

183

184 Key mutated genes were considered to be those mutated in two or more  
185 independent TALE lineages and that were present in at least one clonal sample. If a gene  
186 was mutated in multiple flasks of the same TALE lineage or was only observed in  
187 sequenced population samples, it was not considered. A total of 69 key mutations were  
188 identified for both media types (Supplementary Figure 2). Overall, clones evolved in  
189 RPMI+ typically had a lower number of mutations ( $7.4 \pm 3.4$  mutations per strain)  
190 compared to the ones evolved in CA-MHB ( $10.6 \pm 4.6$  mutations per strain), excluding  
191 hyper-mutators. This mutational count difference is also reflected in the number of key  
192 mutated genes identified in both conditions, 54 versus 26 in CA-MHB and RPMI+,  
193 respectively (Figure 3A). By increasing the threshold of lineages with a given gene  
194 mutated, the decrease in the number of key mutated genes in CA-MHB was striking,  
195 whereas in RPMI+ there was less variance (Figure 3A). Although the *apt* gene appears  
196 as a key mutation in RPMI+ because it was mutated in all four replicates that were started  
197 from wild-type, this mutation has been associated with a growth rate increase in RPMI+  
198 and does not have an effect on antibiotic susceptibility (Salazar et al., 2020). Furthermore,  
199 mutations in *mutL* were found in TALE strains from both media conditions and similarly,  
200 these strains displayed hypermutator phenotypes similar to previous reports (Ban and  
201 Yang, 1998; Glickman and Radman, 1980). The hypermutator strains had a higher  
202 number of mutations, compared to other TALE strains. However, the mutations identified  
203 were not distinctly linked with vancomycin tolerance but randomly spread throughout the  
204 genome (Supplementary Tables 3 and 4).

205

206           Distinct key mutations were identified in both bacteriological and physiological  
207 media conditions, with the overlap of similar mutations being mostly in regulatory genes,  
208 specifically in the *vra* and *wal* regulatory systems (Figure 3A). Mutations in these two  
209 systems have been previously associated with decreased susceptibility to glycopeptides  
210 (Gardete et al., 2012; Howden et al., 2010; Hu et al., 2016; Kato et al., 2010). For the *vra*  
211 system, comprised of the genes *vraSRT*, we identified 37 different mutations, of which 5  
212 exact mutations (VraT-A151T, VraS-A314V, VraS-G88D, VraS-T264A, and VraR-V14I)  
213 and 2 mutated positions (VraT-P126 and VraT-N74) have been previously described  
214 (Cameron et al., 2012; Hu et al., 2016; Kato et al., 2010). For the *wal* system, comprising  
215 genes *walkRyycHI*, we identified 44 mutations, 26 of which were in the accessory genes  
216 *yycHI* (21 resulting in possible pseudogenization, i.e. gene disruption). This  
217 pseudogenization type of gene disruption (specifically, a frameshift mutation resulting in  
218 truncation) had been previously observed in an *in vivo* evolution study in a patient  
219 (Mwangi et al., 2007). From the 18 mutations in *walkR*, only one mutated position has  
220 been previously described (Walk-G223), which in previous studies resulted in an amino  
221 acid substitution at position 223 from glycine to aspartic acid (Howden et al., 2011; Hu et  
222 al., 2015; Vidailiac et al., 2013), and in our case to alanine. The alleles mutated strongly  
223 correlate with the ones found in clinical isolates, although most of the specific mutations  
224 are different, contributing to an expansion of the tolerance alleleome.

225

226           Vancomycin targets the cell wall, therefore, the finding that most of the key mutated  
227 genes under both TALE media conditions were related to cell wall biosynthesis was  
228 expected (i.e., *sgtB*, *prsA*, *walkRyycHI*, *vraSRT*, *pbp2*, *murJ\_2*, *mprF*)(Hiramatsu, 2001;

229 Jousselin et al., 2015; Kuroda et al., 2003; Łęski and Tomasz, 2005; Oku et al., 2004;  
230 Villanueva et al., 2018; Wang et al., 2001). For example, Pbp2 is the only bifunctional *S.*  
231 *aureus* penicillin-binding protein (transglycosylase and transpeptidase activities) (Goffin  
232 and Ghuysen, 1998; Murakami, 1994) and is involved in cell wall cross-linking. Pbp2 has  
233 also been associated with susceptibility to membrane and cell-wall targeting antibiotics  
234 (Łęski and Tomasz, 2005; Sieradzki and Tomasz, 1999). Besides the shared mutations,  
235 there were a number of media-specific mutations (Figure 3B). This environmental  
236 dependency was also evident from the expression of these key mutated genes (Figure  
237 3C). For example, *vraG* and *mprF* genes that are mostly mutated in CA-MHB condition  
238 were highly expressed in vancomycin-tolerized strains in the same media, while there  
239 was no differential expression in RPMI+. On the other hand, some genes that seem to be  
240 mutated in a condition-specific manner presented a similar transcriptional profile in both  
241 (e.g., *sgtB* and *prsA*). Again, most of the key mutated genes were related to cell wall  
242 biosynthesis (e.g., *sgtB*, *prsA*, *walk*, *vraT*, *pbp2*, *mprF*). However, there were other key  
243 mutated genes associated with transcription (*rpoC*), transport (*pitA\_1*, *vraG*), regulation  
244 (*perR*, *melR\_2*), metabolism (*mgo2*), pathogenesis (*ebh\_1*) and unknown function  
245 (*RS08780*).

246

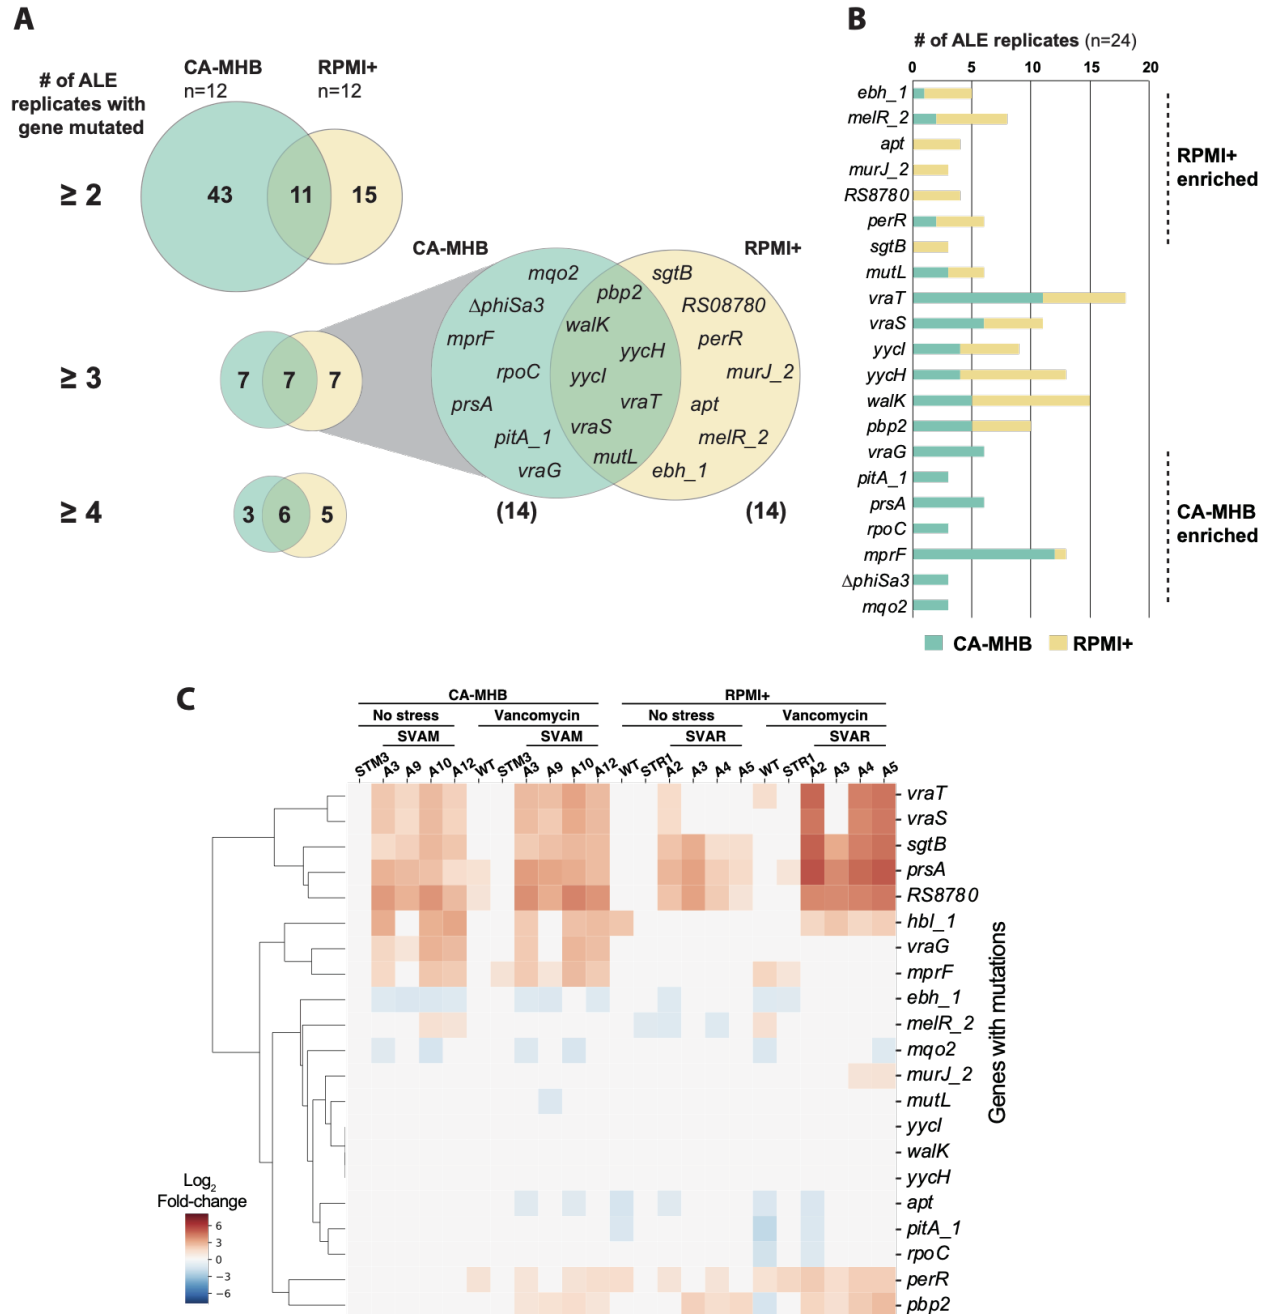

247

248 **Figure 3.** Key mutations found in MRSA during vancomycin tolerization. (A) Venn  
 249 diagrams of the number of key mutated genes in the two utilized media conditions (i.e.,  
 250 CA-MHB and RPMI+). (B) A bar plot of the number of lineages with mutations in a key  
 251 mutated gene, n=24 lineages, 12 for each media condition. (C) A heatmap of

252 expression level of key mutated genes in a selection of starting and TALE-derived  
253 strains, in the presence and absence of vancomycin. STM: *Staphylococcus aureus*  
254 adapted to CA-MHB. STR: *Staphylococcus aureus* adapted to RPMI+. SVAM:  
255 *Staphylococcus aureus* tolerized to vancomycin in CA-MHB. SVAR: *Staphylococcus*  
256 *aureus* tolerized to vancomycin in RPMI+.

257

258

259 Mutational analysis of TALE clones from CA-MHB revealed an instance of parallel  
260 evolution involving excision of the prophage  $\Phi$ Sa3 in three independent lineages. Large  
261 identical genomic deletions of 43,048 bp resulted from the excision of prophage  $\Phi$ Sa3,  
262 the most prevalent prophage family in *S. aureus* (Xia and Wolz, 2014), which encodes for  
263 the immune evasion cluster (Goerke et al., 2009; Verkaik et al., 2011). This cluster  
264 harbors the immune modulators staphylokinase (Sak), staphylococcal complement  
265 inhibitor (SCIN), staphylococcal enterotoxin A (Sea), and chemotaxis inhibitory protein of  
266 *S. aureus* (CHIPS) (Read et al., 2018; van Wamel et al., 2006; Verkaik et al., 2011).  
267 Excision of the prophage results in the repair of the  $\beta$ -hemolysin gene (*hlyB*) (Figure 4A)  
268 (Tran et al., 2019). Selective excision of prophage  $\Phi$ Sa3 has been reported, suggesting  
269 it acts as a molecular regulatory switch for  $\beta$ -hemolysin production (Tran et al., 2019).  
270 Testing of hemolytic activity of two of the three TALE strains and their starting strain  
271 counterparts confirmed one other characteristic phenotype observed in VISA strains,  
272 reduced hemolytic activity (Figure 4B). Since *hlyB* encodes for a cold active hemolysin,  
273 after 24h incubation at 4 °C, it was possible to observe acquired hemolytic activity for the  
274 TALE strains which have excised the prophage  $\Phi$ Sa3 (Figure 4C), strains SVAM\_A10

275 and SVAM\_A12. In contrast, none of the RPMI+ media tolerized strains excised the  
 276 prophage (Figure 3B). The expression of genes encoded in the prophage was analyzed  
 277 in TALE strains derived from both media environments and it was observed that there  
 278 was higher transcriptional activity of prophage genes in RPMI+ as compared to CA-MHB,  
 279 for strains which retained the prophage genes (Figure 4D). This observation suggests an  
 280 advantage in maintaining these prophage genes in RPMI+ upon vancomycin stress.

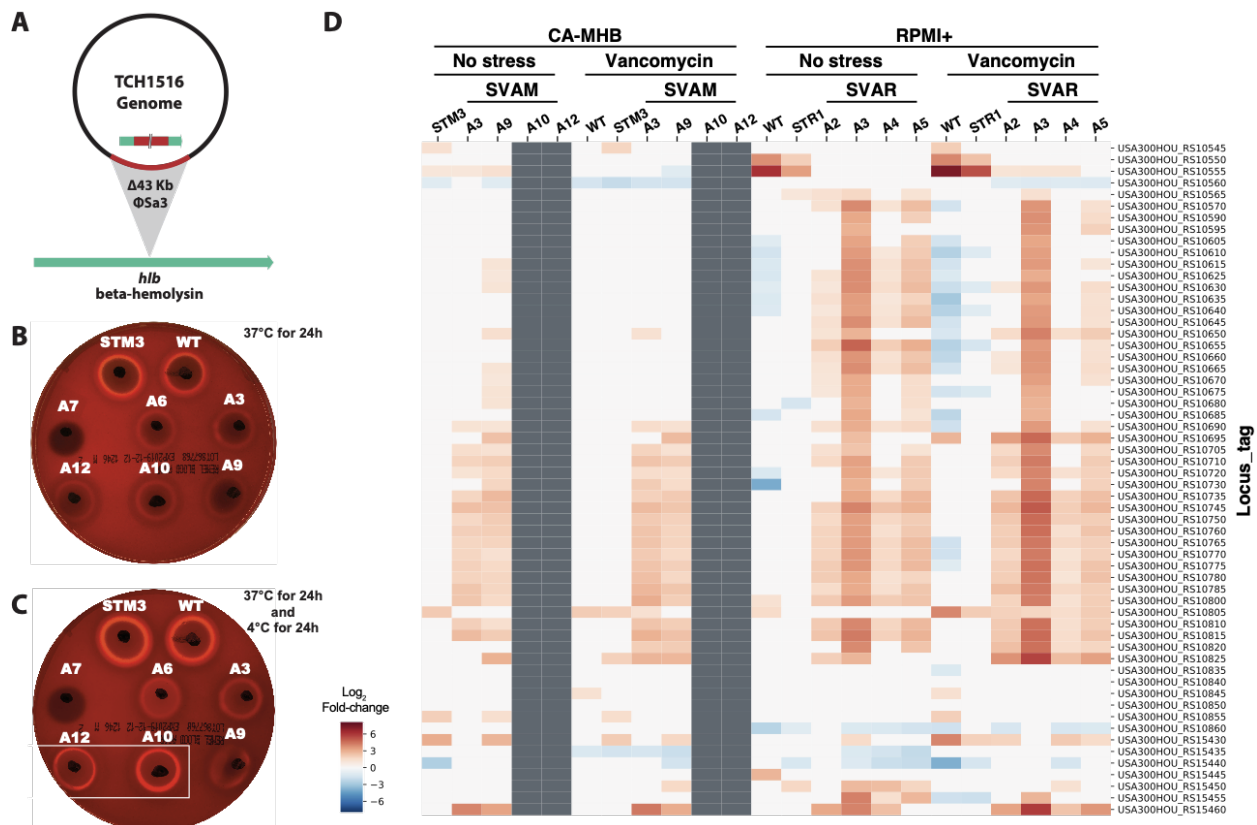

281  
 282 **Figure 4.** The excision of  $\Phi$ Sa3 prophage. (A) Schematic representation of the excision  
 283 of the  $\Phi$ Sa3 prophage from the TCH1516 genome which leads to the repair of *hlyB* gene,  
 284 encoding for a  $\beta$ -hemolysin. (B) An image of a plate displaying hemolytic activity after  
 285 24 h incubation at 37 °C for vancomycin TALE strains in CA-MHB and their  
 286 corresponding starting strains, wild-type (WT) TCH1516 and CA-MHB media-adapted  
 287 STM3. (C) An image of the same plate in B displaying hemolytic activity following an



288 additional 24 h incubation at 4 °C, to assess cold hemolytic activity of  $\beta$ -hemolysin.  
289 Increased hemolytic activity can be seen for strains SVAM\_A10 and SVAM\_A12  
290 (boxed). (D) A heatmap of expression levels of genes encoded within the prophage  
291  $\Phi$ Sa3. Grey indicates absence of the gene in a strain due to excision of the prophage.  
292 STM: *Staphylococcus aureus* adapted to CA-MHB. STR: *Staphylococcus aureus*  
293 adapted to RPMI+. SVAM: *Staphylococcus aureus* tolerized to vancomycin in CA-MHB.  
294 SVAR: *Staphylococcus aureus* tolerized to vancomycin in RPMI+.

295

296 **Broad scale impact of mutations in regulatory genes.** The most commonly mutated  
297 genes in both media conditions during the TALE experiments were annotated with  
298 regulatory functions, with the *walRKyychI* and *vraRST* operons being the most targeted  
299 (Figure 3B). Interestingly, the accessory genes (i.e., *yycH*, *yycI* and *vraT*) known to impact  
300 the activity of these regulators (Boyle-Vavra et al., 2013; Cameron et al., 2016), were  
301 some of the most often mutated. Mutations in regulatory genes tend to impact bacterial  
302 responses on a broad scale, which is difficult to assess solely from mutational data.  
303 Therefore, we performed RNAseq with and without vancomycin stress to understand how  
304 the mutations observed impacted the transcriptional profile of the evolved strains. Within  
305 the previously characterized WalR regulon (Delauné et al., 2012), there were several  
306 genes differentially regulated in the vancomycin TALE clones. In fact, both upregulation  
307 and downregulation was observed in several genes within this regulon (Figure 5A, and  
308 Supplementary Figure 3). Downregulation of the *spa* gene and lower hemolytic activity  
309 are a characteristic of VISA strains (Howden et al., 2010), which was also confirmed from  
310 the acquired transcriptional data (Figure 5A). The pyrimidine operon has been deemed

311 important for growth in RPMI+ (Poudel et al., 2020) and was upregulated in strains  
 312 evolved in this medium. The *VraR* regulon, responsible for the control of the cell wall  
 313 stimulon, showed an overall upregulation in vancomycin-adapted strains (Figure 5B). The  
 314 most upregulated genes, *vraX* and *cwrA*, are described to be part of both regulons (Figure  
 315 5), and have both been linked to cell wall stress response (Balibar et al., 2010; F.  
 316 McAleese et al., 2006). Even though all the characterized vancomycin-tolerized strains  
 317 presented a similar transcriptional rearrangement of these regulons, the analyzed strains  
 318 carried distinct mutations in these regulatory genes (35 and 42 total different mutations in  
 319 the *vra* and *wal* regulons, respectively; Supplementary Tables 3 and 4), suggesting that  
 320 multiple mutational mechanisms can result in a similar transcriptional landscape. Overall,  
 321 the TALE-derived mutations in these regulatory systems form a defined set of multiple  
 322 unique mutations and resulted in significant rearrangements in expression levels of genes  
 323 strongly associated with the observed tolerance phenotypes.

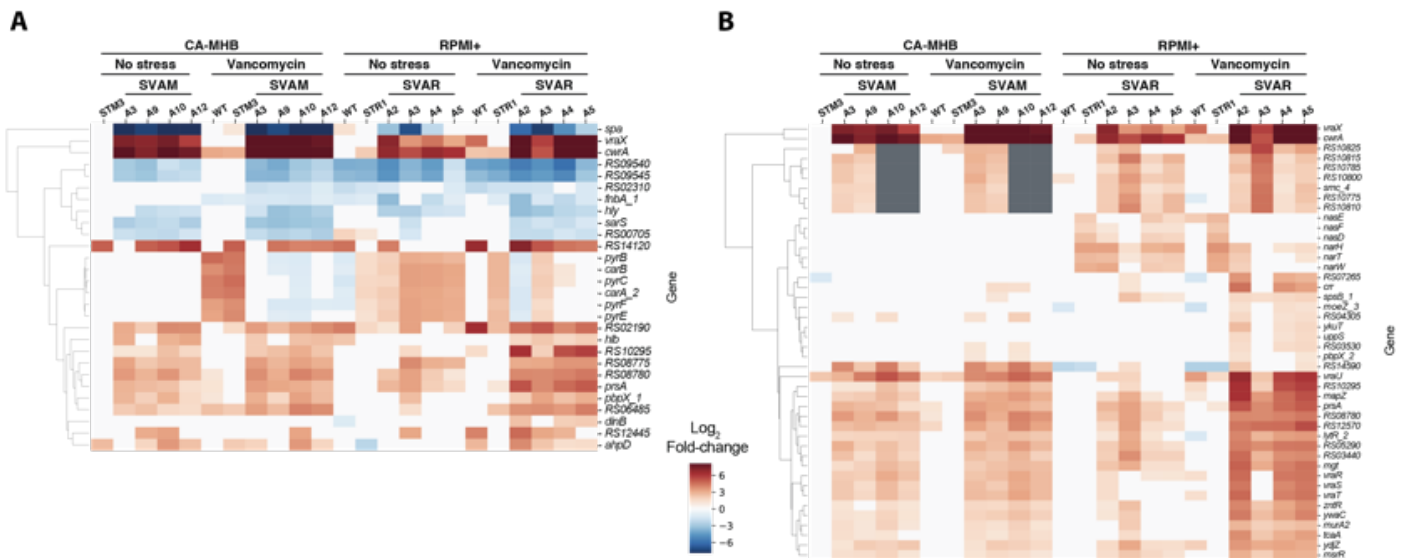

324  
 325 **Figure 5.** Rearranged transcriptional landscapes of operons associated with  
 326 vancomycin tolerance in TALE strains. (A) A heatmap of expression levels of the genes

327 in the WalR regulon (Delauné et al., 2012) displaying significant levels of differential  
328 expression, both up and down. (B) Expression of genes in the VraR cell wall stimulon  
329 (Boyle-Vavra et al., 2013). STM: *Staphylococcus aureus* adapted to CA-MHB. STR:  
330 *Staphylococcus aureus* adapted to RPMI+. SVAM: *Staphylococcus aureus* tolerized to  
331 vancomycin in CA-MHB. SVAR: *Staphylococcus aureus* tolerized to vancomycin in  
332 RPMI+.

333

334 **Elucidation of molecular mechanisms in vancomycin tolerance.** Multiple mutations  
335 in *mprF* were observed in CA-MHB vancomycin-tolerized strains and were validated to  
336 display a significant decrease in negative cell surface charge. *mprF* encodes for a multi  
337 peptide resistance factor and has been associated with increased resistance to  
338 daptomycin and antimicrobial peptides (Ernst et al., 2018; Ernst and Peschel, 2019).  
339 Besides the previously described regulatory gene mutations, *mprF* was the most mutated  
340 gene in strains tolerized to vancomycin in CA-MHB. In the 12 CA-MHB-tolarized lineages,  
341 we identified seven previously reported mutations that lead to resistance through a MprF  
342 mechanism, and extended this knowledge base by identifying 10 new mutations  
343 (Figure6A). The MprF described resistance mechanism consists of decreasing the  
344 negative cell surface charge, and therefore repulsing cationic antimicrobial peptides and  
345 daptomycin (Ernst and Peschel, 2019). Since vancomycin is also a positively-charged  
346 peptide, one can speculate that this general mechanism would lead to increased  
347 vancomycin tolerance. In order to support this, we characterized the cell surface charge  
348 in tolerized mutants and its starting strain counterparts (Figure 6B). Tolerized mutants,  
349 with amino acid changes towards the C-terminal part of MprF, had a significant decrease

350 in negative cell surface charge (Figure 6B and 6C). Strain SVAM\_A3, with an amino acid  
351 change at position 50 (R50C), did not have a significant change in cell surface charge,  
352 which explains the observation of mutational hot-spots between positions 278 to 510  
353 (Figure 6A). Thus, a similar mechanism of shifting the cell surface charge from more to  
354 less negatively-charged was validated for a subset of the *mprF* mutants uncovered from  
355 the TALE experimentation in this study.

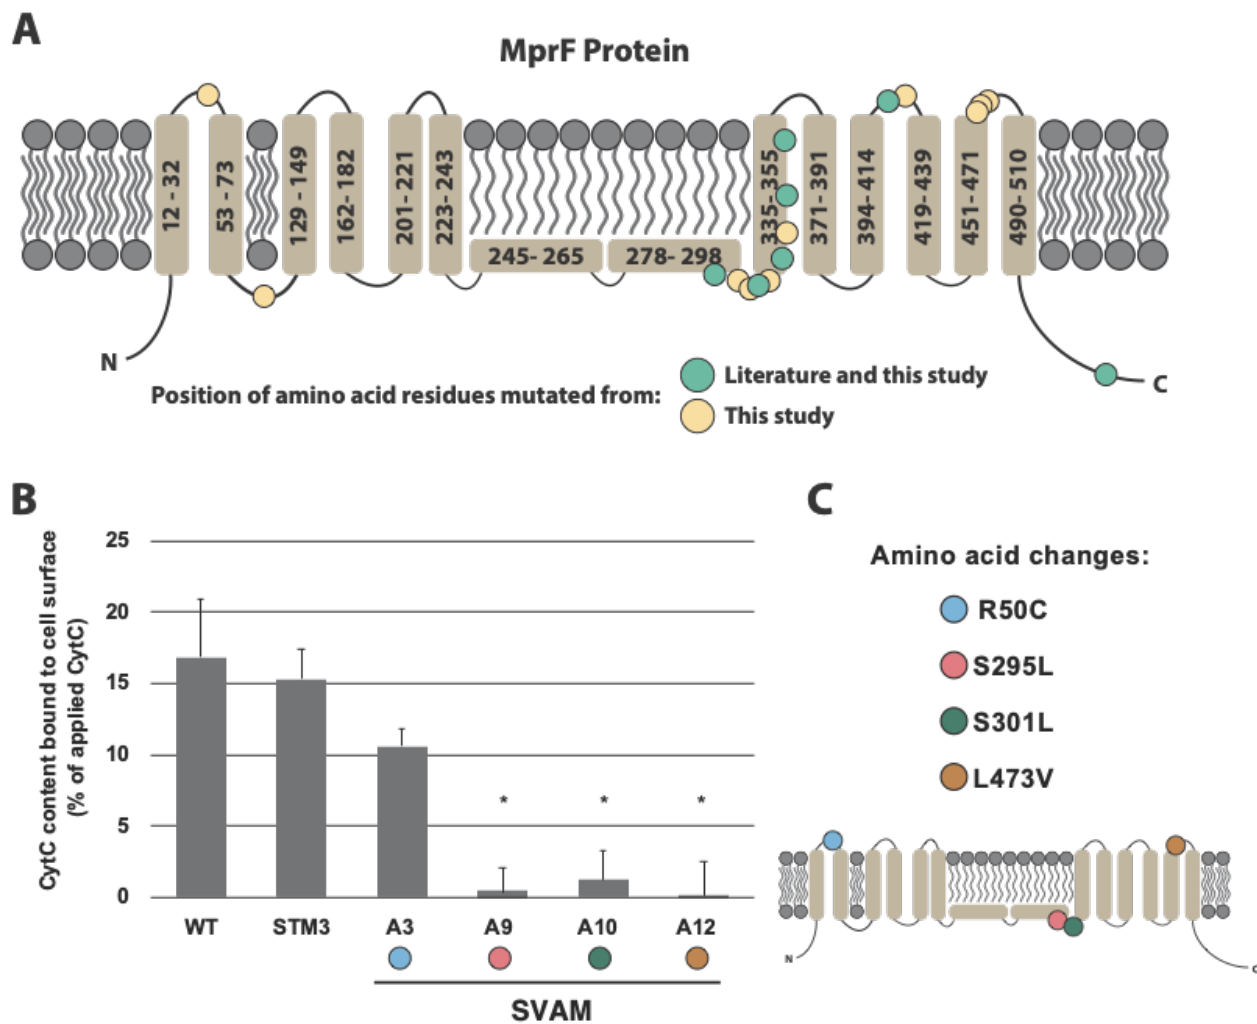

356

357 **Figure 6.** MprF mutations and their effect on cell surface charge. (A) Topology of the  
358 MprF membrane protein and mapping of mutations identified in this dataset (yellow and  
359 green circles), in comparison to previously reported ones (green circles) (Ernst and

360 Peschel, 2019). (B) A graph quantifying the cell surface charge of strains tolerized to  
361 vancomycin, in comparison to their starting strain counterparts. Values that are  
362 significantly different ( $P \leq 0.05$ ) from the value for the respective starting strain (WT or  
363 STM3) by Student's t-Test are indicated by an asterisk. (C) Identified locations of the  
364 specific amino acid substitutions observed in the tolerized strains and their position in  
365 the MprF structure. These mutations correspond to the strains tested in panel B. STM:  
366 *Staphylococcus aureus* adapted to CA-MHB. SVAM: *Staphylococcus aureus* tolerized  
367 to vancomycin in CA-MHB.

368

369 **Association of genetic targets with decreased susceptibility.** Gene inactivation  
370 enables the assessment of a given gene's role in tolerance. In order to understand the  
371 importance of the mutated and highly expressed genes in vancomycin tolerance, we  
372 relied on the available *S. aureus* Nebraska Transposon Mutant Library (Fey et al., 2013).  
373 We identified five genes required for tolerance and five genes impairing tolerance. A  
374 selection of mutants in key mutated genes or highly expressed genes was evaluated for  
375 their vancomycin susceptibility in both environmental conditions (Table 1). Interestingly,  
376 reduced vancomycin susceptibility was seen for all strains when testing was performed  
377 in RPMI+ compared to CA-MHB, in some instances with 2-fold or greater increases in  
378 vancomycin MIC in RPMI+. Media-specific susceptibility was observed for several  
379 mutants, similar to what was observed with the TALE-derived clones. Transposon  
380 inactivation of genes *yycl*, *sgtB*, *melR\_2*, *stp*, and *lytM\_2* resulted in a decreased  
381 susceptibility to vancomycin in RPMI+, but no difference in CA-MHB. On the other hand,  
382 *vraT*, *vraR*, *vraS*, *vraG* and *mprF* showed an increased susceptibility to vancomycin in

383 CA-MHB, but no difference in RPMI+. The fact that gene inactivation can lead to  
384 decreased susceptibility is noteworthy as 57 (15.3%) and 76 (16.5%) of the total  
385 mutations identified lead to likely gene disruption in the RPMI+ and CA-MHB datasets,  
386 respectively. It is noteworthy that some of the gene disruptions identified in our datasets  
387 were in the same genes that showed here a higher MIC upon inactivation, specifically  
388 *yycI* and *stp* (in both media conditions), *melR\_2* (only in RPMI+), and *lytM\_2* (only in CA-  
389 MHB) (Supplementary Tables 3 and 4). These findings not only confirm the role of several  
390 genes (i.e. *yycI*, *sgtB*, *melR\_2*, *stp*, *lytM\_2*, *vraT*, *vraR*, *vraS*, *vraG* and *mprF*) in  
391 vancomycin tolerance, but also highlight the different roles these have in the development  
392 of resistance under varying environmental conditions.

393

394 **Table 1** - Minimum inhibitory concentration (MIC<sub>90</sub>) of *S. aureus* Nebraska Transposon  
395 Mutant Library (Fey et al., 2013) in both environmental conditions, CA-MHB and RPMI+.  
396 Strain ID refers to the NE identifier and the wild-type strain used in the generation of the  
397 transposon mutants (JE2). Gene indicates the gene that has been disrupted by the  
398 transposon.

| Strain ID | Gene        | MIC <sub>90</sub> (µg/mL) |       |
|-----------|-------------|---------------------------|-------|
|           |             | CA-MHB                    | RPMI+ |
| JE2       | -           | 1                         | 2     |
| NE1693    | <i>yycH</i> | 1                         | 2     |
| NE1865    | <i>yycI</i> | 1                         | 4     |

|        |               |            |       |
|--------|---------------|------------|-------|
| NE596  | <i>sgtB</i>   | 1          | 4     |
| NE1304 | <i>melR_2</i> | 1          | 4     |
| NE1919 | <i>stp</i>    | 1          | 4     |
| NE641  | <i>lytM_2</i> | 1          | 4     |
| NE274  | <i>vraT</i>   | 0.5        | 2     |
| NE554  | <i>vraR</i>   | 0.5        | 1 - 2 |
| NE823  | <i>vraS</i>   | 0.5        | 2     |
| NE70   | <i>vraG</i>   | 0.25 - 0.5 | 2     |
| NE1360 | <i>mprF</i>   | 0.25 - 0.5 | 2     |
| NE665  | <i>perR</i>   | 0.5 - 1    | 2     |
| NE387  | <i>cwrA</i>   | 1          | 2     |

399

## 400 Discussion

401 The expanding problem of antibiotic resistant pathogens has been discussed for almost  
402 a century (Podolsky, 2018), but we remain in the infancy of understanding its complexity.

403 In this study, we sought to understand changes in susceptibility, mutational mechanisms  
404 which enable such changes, and phenotypic responses of tolerant strains by analyzing  
405 growth screens, transcriptomics, and specific assays for evolved and mutated strains of  
406 MRSA under multiple media conditions. The main findings from this work are that (i) TALE  
407 successfully generated tolerant strains in both media types, although tolerance  
408 phenotypes translated across media types for CA-MHB TALE-derived strains, the inverse  
409 was not true for RPMI+; (ii) analysis of key mutational mechanisms revealed that  
410 numerous genetic allele variations can lead to similar transcriptional and phenotypic  
411 changes, especially in the CA-MHB condition; and (iii) TALE-derived strains shared  
412 similar properties to resistant clinical isolates in phenotype, mutation types, and gene  
413 expression.

414 There were a number of specific findings that provide context for the main conclusions of  
415 this study. These include, (i) the majority of TALE-derived strains tested maintained a  
416 tolerant phenotype after prolonged evolution under a no vancomycin stress condition; (ii)  
417 greater heterogeneity was found in the mutations observed in TALE-derived strains to  
418 become tolerant in CA-MHB than RPMI+, with a set of shared mutational mechanisms on  
419 the gene level from TALE-derived strains under both media conditions (enriched in cell  
420 wall related regulators), which resulted in major changes in expression for the operons  
421 they regulate even though the unique alleles differed; (iii) mutations in *mprF* are a key  
422 mechanism in CA-MHB, which decreased the overall negative cell surface charge and



423 supposedly limited vancomycin access to the cell wall; (iv) similarly to clinically isolated  
424 strains, TALE-derived strains had lower hemolytic activity and reduced autolysis (Howden  
425 et al., 2010), mutations of the nature of pseudogenization (Mwangi et al., 2007), and  
426 similar transcriptional changes for virulence associated genes (e.g., *spa* (Howden et al.,  
427 2008; Fionnuala McAleese et al., 2006), *agr* (Mwangi et al., 2007; Sakoulas et al., 2002));  
428 and lastly, (v) different genetic targets have enhancing or impairing roles in tolerance,  
429 depending on the environmental condition. Taken together, these findings provide  
430 specific information for a change in susceptibility for an important pathogen, an antibiotic  
431 commonly used to treat it, and media conditions relevant for human host infection and  
432 antimicrobial testing. Moreover, they provide context for the overall development of  
433 antibiotic resistance under multiple conditions and independent lineages that can be used  
434 to understand the issue as a whole.

435 The environmental conditions analyzed here were intended to represent both the *in vivo*  
436 environment simulating the condition of human infection, and the environment under  
437 which standard antimicrobial susceptibility is performed in the clinical laboratory. We  
438 showed that the evolutionary strategies adopted in each condition overlap on two major  
439 regulatory systems, VraR and WalR, which are responsible for the homeostasis of cell  
440 wall (Boyle-Vavra et al., 2013; Dubrac et al., 2007; McCallum et al., 2011; Villanueva et  
441 al., 2018) and had been previously linked to glycopeptide resistance (Howden et al., 2010;  
442 Hu et al., 2016; Kato et al., 2010). More interesting is the fact that besides such regulatory  
443 mutations, which seem to confer similar transcriptional rearrangements, other mutations  
444 were largely media-dependent, suggesting that the different media utilized restricted the  
445 evolutionary process differently. We have previously shown that growth of *S. aureus* in

446 RPMI+ and CA-MHB lead to large transcriptional landscape changes (Poudel et al.,  
447 2020). In RPMI+, the buffering system used is bicarbonate, a ubiquitous buffer found in  
448 humans, which has been shown to potentiate the activity of several antibiotics by  
449 dissipating the proton motive force in bacteria (Ersoy et al., 2017; Farha et al., 2018;  
450 Kumaraswamy et al., 2016). This process might be one of the major reasons for the  
451 distinct evolutionary strategies observed under different media. For instance, this is likely  
452 the reason why we do not observe *mprF* mutations in the RPMI+ evolved strains, but we  
453 do in all the CA-MHB TALE lineages. MprF activity leads to the alteration of the cell  
454 surface charge (Ernst et al., 2018; Ernst and Peschel, 2019), but in the case of RPMI+  
455 the membrane proton motive force is already compromised by the bicarbonate buffer  
456 system (Farha et al., 2018), making it an evolutionarily less viable solution towards  
457 vancomycin tolerance in this media. The tolerance mechanism through *mprF* mutation  
458 also explains the extended lag phase observed for all the strains tolerized in CA-MHB  
459 media, since an altered cell surface charge impacts bacterial cell division (Li et al., 2016;  
460 Strahl and Hamoen, 2010).

461 Even though both media used in vancomycin tolerizations resulted in highly tolerant  
462 vancomycin strains, in the case of strains evolved in RPMI+, this phenotype did not  
463 translate to CA-MHB media. Media dependent susceptibilities have been previously  
464 reported (Ersoy et al., 2017; Farha et al., 2018; Kumaraswamy et al., 2016; Lin et al.,  
465 2015). Here we showed that the evolution of resistance in physiological conditions is not  
466 phenotypically revealed in clinical susceptibility testing (Figure 2B). The fact that  
467 decreased vancomycin susceptibility acquired in RPMI+ simulates the selective  
468 conditions under which it evolves in patients receiving vancomycin (McKee and

469 Komarova, 2017), and that these changes are not detected in the CA-MHB utilized  
470 laboratory testing essentially shows that the clinical laboratory is blind to the clinically  
471 relevant reduction in vancomycin susceptibility that evolves in *S. aureus*. This may explain  
472 the poor clinical efficacy of vancomycin even against *S. aureus* isolates that the laboratory  
473 designates as susceptible. Clinical experience is abundant with patients with MRSA  
474 bacteremia by organisms fully susceptible to vancomycin, yet fail to clear their infection  
475 despite adequate dosing and the lack of surgical solutions. The clinical laboratory  
476 shortcomings in detecting vancomycin resistance in *S. aureus* may be one explanation  
477 for the fact that vancomycin is unique among anti-staphylococcal antibiotics where  
478 resistance took decades to emerge (at least according to the laboratory). Resistance to  
479 every anti-staphylococcal antibiotic has emerged just a few years after the clinical  
480 introduction of that antibiotic, yet for vancomycin, which was introduced into clinical  
481 practice in 1958, VISA was not described until 1997 (Levine, 2006). Examining these data  
482 at an even higher level shows that every mutant from the Nebraska library demonstrated  
483 a higher vancomycin MIC in RPMI+ compared to CA-MHB. Given that the area under the  
484 curve (AUC)/MIC ratio is the pharmacokinetic target reflective of vancomycin activity  
485 suggests considerably weaker activity of vancomycin *in vivo* than in clinical laboratory  
486 conditions would indicate (Giuliano et al., 2010). Indeed, the well-described clinical-  
487 microbiological discordance of vancomycin with regards to *S. aureus* explained by our  
488 findings supports serious re-examination of how antimicrobial susceptibility paradigms  
489 can be made more clinically relevant (Ersoy et al., 2017).

490 During the many years that antibiotic resistance has been studied, associations have  
491 been made between specific alleles and decreased antibiotic susceptibility (Cameron et

492 al., 2012; Howden et al., 2011, 2010; Hu et al., 2015, 2016; Ishii et al., 2015; Mwangi et  
493 al., 2007; Vidailac et al., 2013). Numerous surveys have been conducted using PCR and  
494 sequencing to determine the likelihood of a given strain to be less susceptible to a given  
495 antibiotic (Costa et al., 2018; Kato et al., 2010; Sabat et al., 2018; Shore et al., 2010).  
496 Here we showed that limiting the analysis to a handful of genes can be misleading and  
497 that many allele variants can result in the same outcome. We identified several mutations  
498 in alleles previously associated with decreased susceptibility, with most of the mutations  
499 being new variants. A high-throughput approach utilizing ALE was an efficient way to  
500 sample the evolutionary pathways available for the development of antibiotic resistance,  
501 while expanding on the knowledge of allelic variation responsible for such phenotypes.  
502 Examples provided here are the mutations in the regulatory systems (i.e., *vraSRT* and  
503 *walkRyycHI*) and in *mprF*. We showed that different allele variants in regulatory genes  
504 can impact the transcriptional landscape similarly. We have largely expanded the  
505 knowledge on *mprF* allele variants that result in altered cell surface charge that might lead  
506 to decreased vancomycin susceptibility and bridge the knowledge gap between  
507 vancomycin and peptide antibiotic cross-resistance.  
508 Pseudogenization is another type of genetic variance we believe merits attention. We  
509 previously showed that *S. aureus* restored pseudogenes in order to overcome metabolic  
510 limitations (Machado et al., 2019). In this dataset, approximately 15% of all the mutations  
511 led to pseudogenization, which can translate into decreased susceptibility, as  
512 demonstrated with the transposon mutants (Table 1). This strengthens the hypothesis  
513 that *S. aureus* can use this pseudogenization mechanism to adapt to distinct  
514 environments, including the development of antibiotic resistance. A study looking at the

515 adaptive evolution of *S. aureus* during chronic endobronchial infection of a cystic fibrosis  
516 patient during 26 months identified 391 mutations (comparable to our datasets) with none  
517 of the mutations predicted to result in pseudogene formation (McAdam et al., 2011). The  
518 rates at which pseudogenization occurs and reverts, requires further experimental  
519 evidence in order to support this method as a common evolutionary strategy in *S. aureus*.

520

521 In conclusion, the application of ALE to develop *S. aureus* strains tolerized to vancomycin  
522 was successful and links can be drawn between TALE-derived strains and clinical  
523 isolates. Susceptibility was not only decreased for the targeted antibiotic, but also  
524 reproduced phenotypes similar to the ones previously reported for clinical strains with  
525 decreased vancomycin susceptibility (Howden et al., 2010). Furthermore, it allowed us to  
526 understand evolutionary strategies and constraints in two clinically relevant media  
527 environments while expanding our knowledge on the diversity of alleles contributing to  
528 the vancomycin tolerant phenotype. These findings allow a better understanding of the  
529 evolution of antibiotic resistance and provide new information valuable for the  
530 epidemiological surveillance and control of *S. aureus* resistance in clinical environments.  
531 Most importantly, these data call into question the clinical reliability of *S. aureus*  
532 vancomycin susceptibility testing as it is currently performed in the clinical laboratory by  
533 providing a deeper understanding of why *S. aureus* resistance to vancomycin is rare in  
534 the laboratory yet vancomycin treatment failure is common in clinical practice.

## 535 **Material and Methods**

### 536 *Tolerization Adaptive Laboratory Evolution (TALE)*

537 TALE was performed as previously described (Mohamed et al., 2017), with variations as  
538 noted. Four replicates of each starting strain (wild type and two media-adapted strains  
539 per media type) were inoculated from independent colonies on LB-agar plates. Cultures  
540 were grown in 15 ml working volume tubes which were heated to 37°C and were  
541 aerobically stirred at 1100 rpm. Periodically, optical density readings at a 600 nanometer  
542 wavelength (OD<sub>600</sub>) were taken for each culture with a Tecan Sunrise reader plate, until  
543 the OD<sub>600</sub> reached approximately 0.6 (approximately equivalent to an OD<sub>600</sub> of 1 on a cm  
544 path length reader). At that time, 150 µl of the culture was passed to a fresh tube, to  
545 prevent the cells from reaching stationary phase. The passage volume was adjusted  
546 dynamically based on the actual OD<sub>600</sub> at the time of passage, to keep the number of  
547 cells passed consistent. Additionally, if the culture had grown for several consecutive  
548 flasks (~3 flasks), the vancomycin concentration in the next tube was increased. This  
549 stepwise increase began at 20% of the starting concentration but augmented over the  
550 course of the experiment. Growth rates were estimated for each tube by linear regression  
551 of the natural log of the optical density vs. time. Periodically throughout the experiment,  
552 culture aliquots were taken for long term storage at -80°C by mixing 800 µL of 50%  
553 glycerol with 800 µL of culture.

554

### 555 *Whole genome re-sequencing*

556 DNA sequencing was performed on clones and populations throughout the evolution,  
557 covering two or three timepoints of the evolution. Total genomic DNA was sampled from

558 an overnight culture and extracted using a KingFisher Flex Purification system previously  
559 validated for the high throughput platform mentioned below (Marotz et al., 2017).  
560 Sequencing libraries were prepared using a miniaturized version of the Kapa HyperPlus  
561 Illumina-compatible library prep kit (Kapa Biosystems). DNA extracts were normalized to  
562 5 ng total input per sample using an Echo 550 acoustic liquid handling robot (Labcyte  
563 Inc), and 1/10 scale enzymatic fragmentation, end-repair, and adapter-ligation reactions  
564 carried out using a Mosquito HTS liquid-handling robot (TTP Labtech Inc). Sequencing  
565 adapters were based on the iTru protocol (Glenn et al., 2019) , in which short universal  
566 adapter stubs are ligated first and then sample-specific barcoded sequences added in a  
567 subsequent PCR step. Amplified and barcoded libraries were then quantified using a  
568 PicoGreen assay and pooled in approximately equimolar ratios before being sequenced  
569 on an Illumina HiSeq 4000 instrument.

570 The obtained sequencing reads were trimmed and filtered using AfterQC software,  
571 version 0.9.6 (Chen et al., 2017). Re-sequencing analysis for mutation identification was  
572 performed using the breseq bioinformatics pipeline (Deatherage and Barrick, 2014),  
573 version 0.31.1 and the *S. aureus* TCH1516 reference genome (GCA\_000017085.1),  
574 reannotated using PATRIC (Brettin et al., 2015). ALEdb was used for mutation analysis  
575 (Phaneuf et al., 2018).

576

### 577 *Minimum inhibitory concentration*

578 Strains were pre-cultured in the corresponding media (CA-MHB or RPMI+10%LB) for  
579 ~5h, and then inoculated to a final OD of 0.002 in media with or without vancomycin  
580 (Sigma). Growth was measured by following OD<sub>600</sub> in a Bioscreen C Reader system with

581 150  $\mu$ L per well. MIC<sub>90</sub> was determined at 17 h post incubation. The experiments were  
582 done in biological triplicates.

583

#### 584 *Estimation of growth parameters*

585 Growth parameters were estimated as previously described (Anand et al., 2020). Briefly,  
586 lag phase was estimated by fitting the Baranyi growth model (Baranyi and Roberts, 1994)  
587 using nonlinear regression in R. A sensitivity analysis was run to exclude data points  
588 beyond a specific time threshold T, to avoid skewing the estimated parameters as a result  
589 of a possible cell death phase, secondary growth phase or noise. The sensitivity analysis  
590 ensured that the lag phase, exponential phase and stationary phase only are taken into  
591 account in the fitting process, because all other growth/death phases are not explicitly  
592 modeled in Baranyi's equation. Anova was run in R using aov() to test the null hypothesis  
593 that there is no difference in lag phase duration between pre-evolved strains (WT, STM2,  
594 STM3, STR1 and STR4) and vancomycin adapted strains.

595

#### 596 *Resistance phenotype stability*

597 Following TALE adaptation to vancomycin, a subset of the TALE strains (6 from each  
598 media) were further evolved in duplicate in the respective media for  $21.79 \pm 2.08$   
599 passages,  $9.41 \times 10^{11} \pm 9.84 \times 10^{10}$  CCDs. The final populations were then evaluated for  
600 their vancomycin susceptibility as described above.

601

#### 602 *Transcriptomics*



603 Eight TALE strains were selected for transcriptional analysis, along with their pre-evolved  
604 counterparts (wild type and one media-adapted strain per medium). Total RNA was  
605 sampled from biological duplicate cultures. The strains were grown in each respective  
606 media, with and without vancomycin (at 1/2 MIC). At OD 0.2, cultures without vancomycin  
607 were harvested. At the same OD, cultures were treated with 0.5x MIC of vancomycin, and  
608 harvested for RNA 30min after. Harvesting of the cells consisted in mixing of 3 mL of  
609 culture with two volumes of Qiagen RNA-protect Bacteria Reagent (6 ml), vortexed for 5  
610 s, incubated at room temperature for 5 min and immediately centrifuged for 10 min at  
611 17,500 r.p.m.. The supernatant was decanted, and the cell pellet was stored at  $-80^{\circ}\text{C}$ .  
612 Total RNA was isolated using the Quick RNA Fungal/Bacterial Microprep (Zymo  
613 Research), following vendor procedures, including an on-column DNase treatment. RNA  
614 quality and purity was assessed using Nanodrop and Bioanalyzer RNA nano chip.  
615 Ribosomal RNA was removed from total RNA preparations using RNaseH. Then  
616 secondary structures in the ribosomal RNA were removed by heating to 90 degrees for 1  
617 second, a set of 32-mer DNA oligo probes complementary to the 5S, 16S, and 23S  
618 subunits and spaced 9 bases apart were then annealed at 65 degrees followed by  
619 digestion with Hybridase (Lucigen), a thermostable RNaseH. The enzyme was added at  
620  $65^{\circ}\text{C}$ , the reaction incubated for 20 minutes at that temperature, then heated again to 90  
621  $^{\circ}\text{C}$  for 1 second to remove remaining secondary structures, and returned to  $65^{\circ}\text{C}$  for 10  
622 minutes. The reaction was quickly quenched by the addition of guanidine thiocyanate  
623 while still at  $65^{\circ}\text{C}$  before purifying the mRNA with a Zymo Research RNA Clean and  
624 Concentrator kit using their 200 nt cutoff protocol. Carryover oligos were removed with a  
625 DNase I digestion which started at room temperature and gradually increased to  $42^{\circ}\text{C}$

626 over a half hour. This was followed up with another column purification as stated above.  
627 The remaining RNA was used to build a cDNA library for sequencing using a KAPA  
628 Stranded RNA-seq Library Preparation Kit. The generated cDNA libraries were sent for  
629 Illumina sequencing on a HiSeq 4000.  
630 The phred quality scores for the Illumina sequencing reads were generated using FastQC  
631 package (Andrews and Others, 2010). Bowtie2 was used to align the raw reads to  
632 TCH1516 genome (GCA\_000017085.1) and to calculate alignment percentage  
633 (Langmead and Salzberg, 2012). The aligned reads were then normalized to transcripts  
634 per million (TPM) with DESeq2 (Love et al., 2014). The final expression values were log-  
635 transformed  $\log_2[\text{TPM} + 1]$  for visualization and analysis.

636

#### 637 *Hemolysin production*

638 Analysis of hemolysin production was performed by spotting 10  $\mu\text{L}$  of a  $\text{OD}_{600}$  culture of  
639 1 grown in CA-MHB onto 5% sheep blood agar plates. Plates were incubated at 37 °C for  
640 24 h, followed by a 4 °C incubation for another 24 h. Hemolysin production was monitored  
641 after both incubations by observing the appearance of a clear halo.

642

#### 643 *Surface charge*

644 Quantification of the relative cell surface charge was performed using a cytochrome C  
645 (Sigma) binding assay, as previously described (Peschel et al., 1999). Briefly, cells were  
646 grown in CA-MHB until an  $\text{OD}_{600}$  of  $\sim 2$ , washed twice with MOPS buffer (20 mM, pH 7)  
647 and finally resuspended to an  $\text{OD}_{600}$  of 5. These were incubated for 10 min with 0.5 mg/ml  
648 (cytochrome c), which was subsequently removed by centrifugation. The amount of

649 cytochrome C was spectrophotometrically quantified at 530nm. The amount of  
650 cytochrome C bound to the cells can be used as a proxy for the cell surface charge. The  
651 experiments were done in biological triplicates.

652

#### 653 *Autolysis assay*

654 Evaluation of autolysis was performed using the Triton X-100-induced autolysis assay.  
655 Cells were grown to an OD<sub>600</sub> of 1, washed twice with PBS buffer and resuspended in  
656 PBS buffer containing 0.05 % Triton X-100. Cell suspensions were incubated at 37 °C  
657 and autolytic activity was measured by monitoring the OD<sub>600</sub> every hour using Tecan  
658 Infinite 200 Pro microplate reader. The experiments were done in biological triplicates.

659

#### 660 *Accession number(s)*

661 Newly determined DNA sequence data were deposited in the NCBI database under  
662 BioProject PRJNA521551, accession numbers SRR8552163 to SRR8552250. All RNA-  
663 seq data have been deposited to the GEO database (record GSE149213) and Short Read  
664 Archive (SRA), RNA-seq data accession numbers SRX8164260 to SRX8164307.

665

#### 666 **Acknowledgements**

667 This research was supported by NIH NIAID grant (U01-AI124316).

668 **Supplemental material**

669 **Table S1** - Minimum inhibitory concentration (MIC<sub>90</sub>) of *S. aureus* starting strains and  
670 TALE-derived strains in the same environmental conditions used for tolerance evolution,  
671 CA-MHB or RPMI+. Post-TALE refers to the MIC<sub>90</sub> of the population after  $21.79 \pm 2.08$   
672 passages ( $9.41 \times 10^{11} \pm 9.84 \times 10^{10}$  CCDs) in the media used for evolution, without  
673 vancomycin. The post-TALE evolution was performed in duplicate for each of the end-  
674 point clones.

675

676 **Figure S1** – Characteristics of vancomycin TALE strains. (A) An image of a plate  
677 displaying hemolytic activity after 24 h incubation at 37 °C for starting strains and  
678 vancomycin TALE strains (B) Autolysis of whole cells of *S. aureus*. Mid-exponential-  
679 phase cultures were resuspended in 0.05 M Tris-HCl (pH 7.2) containing 0.05% Triton X-  
680 100 and were incubated at 30°C. Absorbance was measured every hour and percentage  
681 to initial absorbance calculated.

682

683 **Table S2** – ANOVA statistical analysis of the lag-phase duration of starting strains and  
684 evolved strains in the same media as that used for tolerization.

685

686 **Figure S2** – Venn diagram of the key mutated genes ( $\geq 2$  instances) in the two utilized  
687 media conditions (i.e., CA-MHB and RPMI+).

688

689 **Table S3** - Mutations identified for TALE-derived strains after tolerization to vancomycin  
690 in CA-MHB. Nomenclature example A1 F29 I1 R1 = ALE 1 Flask 29 Isolate (I1=clone,  
691 I0=population) Replicate 1.

692

693 **Table S4** - Mutations identified for TALE-derived strains after tolerization to vancomycin  
694 in RPMI+. Nomenclature example A1 F29 I1 R1 = ALE 1 Flask 29 Isolate (I1=clone,  
695 I0=population) Replicate 1.

## 696 References

- 697 Alcock BP, Raphenya AR, Lau TTY, Tsang KK, Bouchard M, Edalatmand A, Huynh W,  
698 Nguyen A-LV, Cheng AA, Liu S, Min SY, Miroshnichenko A, Tran H-K, Werfalli RE,  
699 Nasir JA, Oloni M, Speicher DJ, Florescu A, Singh B, Faltyn M, Hernandez-  
700 Koutoucheva A, Sharma AN, Bordeleau E, Pawlowski AC, Zubyk HL, Dooley D,  
701 Griffiths E, Maguire F, Winsor GL, Beiko RG, Brinkman FSL, Hsiao WWL,  
702 Domselaar GV, McArthur AG. 2020. CARD 2020: antibiotic resistance surveillance  
703 with the comprehensive antibiotic resistance database. *Nucleic Acids Res*  
704 **48**:D517–D525.
- 705 Anand A, Chen K, Catoi E, Sastry AV, Olson CA, Sandberg TE, Seif Y, Xu S, Szubin  
706 R, Yang L, Feist AM, Palsson BO. 2020. OxyR Is a Convergent Target for  
707 Mutations Acquired during Adaptation to Oxidative Stress-Prone Metabolic States.  
708 *Mol Biol Evol* **37**:660–667.
- 709 Andrews S, Others. 2010. FastQC: a quality control tool for high throughput sequence  
710 data.
- 711 Balibar CJ, Shen X, McGuire D, Yu D, McKenney D, Tao J. 2010. *cwrA*, a gene that  
712 specifically responds to cell wall damage in *Staphylococcus aureus*. *Microbiology*  
713 **156**:1372–1383.
- 714 Ban C, Yang W. 1998. Crystal structure and ATPase activity of MutL: implications for  
715 DNA repair and mutagenesis. *Cell* **95**:541–552.
- 716 Baranyi J, Roberts TA. 1994. A dynamic approach to predicting bacterial growth in food.  
717 *Int J Food Microbiol* **23**:277–294.
- 718 Boyle-Vavra S, Yin S, Jo DS, Montgomery CP, Daum RS. 2013. VraT/YvqF is required

719 for methicillin resistance and activation of the *VraSR* regulon in *Staphylococcus*  
720 *aureus*. *Antimicrob Agents Chemother* **57**:83–95.

721 Brettin T, Davis JJ, Disz T, Edwards RA, Gerdes S, Olsen GJ, Olson R, Overbeek R,  
722 Parrello B, Pusch GD, Shukla M, Thomason JA 3rd, Stevens R, Vonstein V,  
723 Wattam AR, Xia F. 2015. RASTtk: a modular and extensible implementation of the  
724 RAST algorithm for building custom annotation pipelines and annotating batches of  
725 genomes. *Sci Rep* **5**:8365.

726 Cameron DR, Jiang JH, Kostoulias X, Foxwell DJ, Peleg AY. 2016. Vancomycin  
727 susceptibility in methicillin-resistant *Staphylococcus aureus* is mediated by YycH1  
728 activation of the WalRK essential two-component regulatory system. *Sci Rep* **6**:1–  
729 11.

730 Cameron DR, Ward DV, Kostoulias X, Howden BP, Moellering RC Jr, Eliopoulos GM,  
731 Peleg AY. 2012. Serine/threonine phosphatase Stp1 contributes to reduced  
732 susceptibility to vancomycin and virulence in *Staphylococcus aureus*. *J Infect Dis*  
733 **205**:1677–1687.

734 Chen S, Huang T, Zhou Y, Han Y, Xu M, Gu J. 2017. AfterQC: automatic filtering,  
735 trimming, error removing and quality control for fastq data. *BMC Bioinformatics*  
736 **18**:80.

737 Costa SS, Sobkowiak B, Parreira R, Edgeworth JD, Viveiros M, Clark TG, Couto I.  
738 2018. Genetic Diversity of *norA*, Coding for a Main Efflux Pump of *Staphylococcus*  
739 *aureus*. *Front Genet* **9**:710.

740 Deatherage DE, Barrick JE. 2014. Identification of mutations in laboratory-evolved  
741 microbes from next-generation sequencing data using breseq. *Methods Mol Biol*

- 742       **1151**:165–188.
- 743   Delauné A, Dubrac S, Blanchet C, Poupel O, Mäder U, Hiron A, Leduc A, Fitting C,  
744       Nicolas P, Cavaillon J-M, Adib-Conquy M, Msadek T. 2012. The WalkR system  
745       controls major staphylococcal virulence genes and is involved in triggering the host  
746       inflammatory response. *Infect Immun* **80**:3438–3453.
- 747   Dragosits M, Mattanovich D. 2013. Adaptive laboratory evolution - principles and  
748       applications for biotechnology. *Microb Cell Fact* **12**:1.
- 749   Dubrac S, Boneca IG, Poupel O, Msadek T. 2007. New insights into the Walk/WalR  
750       (YycG/YycF) essential signal transduction pathway reveal a major role in controlling  
751       cell wall metabolism and biofilm formation in *Staphylococcus aureus*. *J Bacteriol*  
752       **189**:8257–8269.
- 753   Ernst CM, Peschel A. 2019. MprF-mediated daptomycin resistance. *Int J Med Microbiol*.  
754       doi:10.1016/j.ijmm.2019.05.010
- 755   Ernst CM, Slavetinsky CJ, Kuhn S, Hauser JN, Nega M, Mishra NN, Gekeler C, Bayer  
756       AS, Peschel A. 2018. Gain-of-Function Mutations in the Phospholipid Flippase  
757       MprF Confer Specific Daptomycin Resistance. *mBio*. doi:10.1128/mbio.01659-18
- 758   Ersoy SC, Heithoff DM, Barnes L 5th, Tripp GK, House JK, Marth JD, Smith JW, Mahan  
759       MJ. 2017. Correcting a Fundamental Flaw in the Paradigm for Antimicrobial  
760       Susceptibility Testing. *EBioMedicine* **20**:173–181.
- 761   Farha MA, French S, Stokes JM, Brown ED. 2018. Bicarbonate Alters Bacterial  
762       Susceptibility to Antibiotics by Targeting the Proton Motive Force. *ACS Infect Dis*  
763       **4**:382–390.
- 764   Fey PD, Endres JL, Yajjala VK, Widhelm TJ, Boissy RJ, Bose JL, Bayles KW. 2013. A



- 765 genetic resource for rapid and comprehensive phenotype screening of nonessential  
766 *Staphylococcus aureus* genes. *MBio* **4**:e00537–12.
- 767 Gardete S, Kim C, Hartmann BM, Mwangi M, Roux CM, Dunman PM, Chambers HF,  
768 Tomasz A. 2012. Genetic pathway in acquisition and loss of vancomycin resistance  
769 in a methicillin resistant *Staphylococcus aureus* (MRSA) strain of clonal type  
770 USA300. *PLoS Pathog* **8**.
- 771 Giuliano C, Haase KK, Hall R. 2010. Use of vancomycin pharmacokinetic–  
772 pharmacodynamic properties in the treatment of MRSA infections. *Expert Rev Anti*  
773 *Infect Ther* **8**:95–106.
- 774 Glenn TC, Nilsen RA, Kieran TJ, Sanders JG, Bayona-Vásquez NJ, Finger JW, Pierson  
775 TW, Bentley KE, Hoffberg SL, Louha S, Garcia-De Leon FJ, del Rio Portilla MA,  
776 Reed KD, Anderson JL, Meece JK, Aggrey SE, Rekaya R, Alabady M, Belanger M,  
777 Winker K, Faircloth BC. 2019. Adapterama I: universal stubs and primers for 384  
778 unique dual-indexed or 147,456 combinatorially-indexed Illumina libraries (iTru &  
779 iNext). *PeerJ*. doi:10.7717/peerj.7755
- 780 Glickman BW, Radman M. 1980. *Escherichia coli* mutator mutants deficient in  
781 methylation-instructed DNA mismatch correction. *Proc Natl Acad Sci U S A*  
782 **77**:1063–1067.
- 783 Goerke C, Pantucek R, Holtfreter S, Schulte B, Zink M, Grumann D, Bröker BM, Doskar  
784 J, Wolz C. 2009. Diversity of prophages in dominant *Staphylococcus aureus* clonal  
785 lineages. *J Bacteriol* **191**:3462–3468.
- 786 Goffin C, Ghuysen JM. 1998. Multimodular penicillin-binding proteins: an enigmatic  
787 family of orthologs and paralogs. *Microbiol Mol Biol Rev* **62**:1079–1093.

- 788 Hershberg R. 2015. Mutation—the engine of evolution: studying mutation and its role in  
789 the evolution of bacteria. *Cold Spring Harbor perspectives in*.
- 790 Hershberg R, Petrov DA. 2010. Evidence that mutation is universally biased towards AT  
791 in bacteria. *PLoS Genet* **6**:e1001115.
- 792 Hidayat LK, Hsu DI, Quist R, Shriner KA, Wong-Beringer A. 2006. High-dose  
793 vancomycin therapy for methicillin-resistant *Staphylococcus aureus* infections:  
794 efficacy and toxicity. *Arch Intern Med* **166**:2138–2144.
- 795 Hildebrand F, Meyer A, Eyre-Walker A. 2010. Evidence of selection upon genomic GC-  
796 content in bacteria. *PLoS Genet* **6**:e1001107.
- 797 Hiramatsu K. 2001. Vancomycin-resistant *Staphylococcus aureus*: a new model of  
798 antibiotic resistance. *Lancet Infect Dis* **1**:147–155.
- 799 Hiramatsu K, Aritaka N, Hanaki H, Kawasaki S, Hosoda Y, Hori S, Fukuchi Y,  
800 Kobayashi I. 1997. Dissemination in Japanese hospitals of strains of  
801 *Staphylococcus aureus* heterogeneously resistant to vancomycin. *Lancet*  
802 **350**:1670–1673.
- 803 Howden BP, Davies JK, Johnson PDR, Stinear TP, Grayson ML. 2010. Reduced  
804 vancomycin susceptibility in *Staphylococcus aureus*, including vancomycin-  
805 intermediate and heterogeneous vancomycin-intermediate strains: Resistance  
806 mechanisms, laboratory detection, and clinical implications. *Clin Microbiol Rev*  
807 **23**:99–139.
- 808 Howden BP, McEvoy CRE, Allen DL, Chua K, Gao W, Harrison PF, Bell J, Coombs G,  
809 Bennett-Wood V, Porter JL, Robins-Browne R, Davies JK, Seemann T, Stinear TP.  
810 2011. Evolution of multidrug resistance during *Staphylococcus aureus* infection

811 involves mutation of the essential two component regulator WalkR. *PLoS Pathog*  
812 **7**:e1002359.

813 Howden BP, Smith DJ, Mansell A, Johnson PDR, Ward PB, Stinear TP, Davies JK.  
814 2008. Different bacterial gene expression patterns and attenuated host immune  
815 responses are associated with the evolution of low-level vancomycin resistance  
816 during persistent methicillin-resistant *Staphylococcus aureus* bacteraemia. *BMC*  
817 *Microbiology*. doi:10.1186/1471-2180-8-39

818 Howe RA, Bowker KE, Walsh TR, Feest TG, MacGowan AP. 1998. Vancomycin-  
819 resistant *Staphylococcus aureus*. *Lancet*.

820 Hu J, Zhang X, Liu X, Chen C, Sun B. 2015. Mechanism of reduced vancomycin  
821 susceptibility conferred by *walk* mutation in community-acquired methicillin-  
822 resistant *Staphylococcus aureus* strain MW2. *Antimicrob Agents Chemother*  
823 **59**:1352–1355.

824 Hu Q, Peng H, Rao X. 2016. Molecular events for promotion of vancomycin resistance  
825 in vancomycin intermediate *Staphylococcus aureus*. *Front Microbiol* **7**.  
826 doi:10.3389/fmicb.2016.01601

827 Ishii K, Tabuchi F, Matsuo M, Tatsuno K, Sato T, Okazaki M, Hamamoto H, Matsumoto  
828 Y, Kaito C, Aoyagi T, Hiramatsu K, Kaku M, Moriya K, Sekimizu K. 2015.  
829 Phenotypic and genomic comparisons of highly vancomycin-resistant  
830 *Staphylococcus aureus* strains developed from multiple clinical MRSA strains by in  
831 vitro mutagenesis. *Sci Rep* **5**:17092.

832 Jouselin A, Manzano C, Biette A, Reed P, Pinho MG, Rosato AE, Kelley WL, Renzoni  
833 A. 2015. The *Staphylococcus aureus* Chaperone PrsA Is a New Auxiliary Factor of

- 834 Oxacillin Resistance Affecting Penicillin-Binding Protein 2A. *Antimicrob Agents*  
835 *Chemother* **60**:1656–1666.
- 836 Kato Y, Suzuki T, Ida T, Maebashi K. 2010. Genetic changes associated with  
837 glycopeptide resistance in *Staphylococcus aureus*: predominance of amino acid  
838 substitutions in YvqF/VraSR. *J Antimicrob Chemother* **65**:37–45.
- 839 Kumaraswamy M, Lin L, Olson J, Sun C-F, Nonejuie P, Corriden R, Döhrmann S, Ali  
840 SR, Amaro D, Rohde M, Pogliano J, Sakoulas G, Nizet V. 2016. Standard  
841 susceptibility testing overlooks potent azithromycin activity and cationic peptide  
842 synergy against MDR *Stenotrophomonas maltophilia*. *J Antimicrob Chemother*  
843 **71**:1264–1269.
- 844 Kuroda M, Kuroda H, Oshima T, Takeuchi F, Mori H, Hiramatsu K. 2003. Two-  
845 component system VraSR positively modulates the regulation of cell-wall  
846 biosynthesis pathway in *Staphylococcus aureus*. *Mol Microbiol* **49**:807–821.
- 847 Langmead B, Salzberg SL. 2012. Fast gapped-read alignment with Bowtie 2. *Nat*  
848 *Methods* **9**:357–359.
- 849 Łęski TA, Tomasz A. 2005. Role of Penicillin-Binding Protein 2 (PBP2) in the Antibiotic  
850 Susceptibility and Cell Wall Cross-Linking of *Staphylococcus aureus*: Evidence for  
851 the Cooperative Functioning of PBP2, PBP4, and PBP2A. *J Bacteriol* **187**:1815–  
852 1824.
- 853 Levine DP. 2006. Vancomycin: a history. *Clin Infect Dis* **42 Suppl 1**:S5–12.
- 854 Li B, Qiu Y, Shi H, Yin H. 2016. The importance of lag time extension in determining  
855 bacterial resistance to antibiotics. *Analyst* **141**:3059–3067.
- 856 Lin L, Nonejuie P, Munguia J, Hollands A, Olson J, Dam Q, Kumaraswamy M, Rivera H

857 Jr, Corriden R, Rohde M, Hensler ME, Burkart MD, Pogliano J, Sakoulas G, Nizet  
858 V. 2015. Azithromycin Synergizes with Cationic Antimicrobial Peptides to Exert  
859 Bactericidal and Therapeutic Activity Against Highly Multidrug-Resistant Gram-  
860 Negative Bacterial Pathogens. *EBioMedicine* **2**:690–698.

861 Love MI, Huber W, Anders S. 2014. Moderated estimation of fold change and  
862 dispersion for RNA-seq data with DESeq. *2 Genome Biol* **15**: 550.

863 Machado H, Weng LL, Dillon N, Seif Y, Holland M, Pekar JE, Monk JM, Nizet V,  
864 Palsson BO, Feist AM. 2019. A defined minimal medium for systems analyses of  
865 *Staphylococcus aureus* reveals strain-specific metabolic requirements. *Appl*  
866 *Environ Microbiol* AEM–01773.

867 Marotz C, Amir A, Humphrey G, Gaffney J, Gogul G, Knight R. 2017. DNA extraction for  
868 streamlined metagenomics of diverse environmental samples. *Biotechniques*  
869 **62**:290–293.

870 Martens E, Demain AL. 2017. The antibiotic resistance crisis, with a focus on the United  
871 States. *J Antibiot* **1**–7.

872 McAdam PR, Holmes A, Templeton KE, Fitzgerald JR. 2011. Adaptive evolution of  
873 *Staphylococcus aureus* during chronic endobronchial infection of a cystic fibrosis  
874 patient. *PLoS One* **6**:e24301.

875 McAleese F, Wu SW, Sieradzki K, Dunman P, Murphy E, Projan S, Tomasz A. 2006.  
876 Overexpression of Genes of the Cell Wall Stimulon in Clinical Isolates of  
877 *Staphylococcus aureus* Exhibiting Vancomycin-Intermediate- S. aureus-Type  
878 Resistance to Vancomycin. *Journal of Bacteriology*. doi:10.1128/jb.188.3.1120-  
879 1133.2006

- 880 McAleese F, Wu SW, Sieradzki K, Dunman P, Murphy E, Projan S, Tomasz A. 2006.  
881 Overexpression of genes of the cell wall stimulon in clinical isolates of  
882 *Staphylococcus aureus* exhibiting vancomycin-intermediate-S. aureus-type  
883 resistance to vancomycin. *J Bacteriol* **188**:1120–1133.
- 884 McCallum N, Stutzmann Meier P, Heusser R, Berger-Bächi B. 2011. Mutational  
885 analyses of open reading frames within the *vraSR* operon and their roles in the cell  
886 wall stress response of *Staphylococcus aureus*. *Antimicrob Agents Chemother*  
887 **55**:1391–1402.
- 888 McKee TJ, Komarova SV. 2017. Is it time to reinvent basic cell culture medium? *Am J*  
889 *Physiol Cell Physiol* **312**:C624–C626.
- 890 Mitsakakis K, Kaman WE, Elshout G, Specht M, Hays JP. 2018. Challenges in  
891 identifying antibiotic resistance targets for point-of-care diagnostics in general  
892 practice. *Future Microbiol* **13**:1157–1164.
- 893 Mohamed ET, Wang S, Lennen RM, Herrgård MJ, Simmons BA, Singer SW, Feist AM.  
894 2017. Generation of a platform strain for ionic liquid tolerance using adaptive  
895 laboratory evolution. *Microb Cell Fact* **16**:1–15.
- 896 Murakami K. 1994. Nucleotide sequence of the structural gene for the penicillin-binding  
897 protein 2 of *Staphylococcus aureus* and the presence of a homologous gene in  
898 other staphylococci. *FEMS Microbiology Letters*. doi:10.1016/0378-1097(94)90184-  
899 8
- 900 Mwangi MM, Wu SW, Zhou Y, Sieradzki K, de Lencastre H, Richardson P, Bruce D,  
901 Rubin E, Myers E, Siggia ED, Tomasz A. 2007. Tracking the in vivo evolution of  
902 multidrug resistance in *Staphylococcus aureus* by whole-genome sequencing. *Proc*

- 903 *Natl Acad Sci U S A* **104**:9451–9456.
- 904 Oku Y, Kurokawa K, Ichihashi N, Sekimizu K. 2004. Characterization of the  
905 *Staphylococcus aureus mprF* gene, involved in lysinylation of phosphatidylglycerol.  
906 *Microbiology* **150**:45–51.
- 907 Organization WH. 2014. Antimicrobial resistance: global report on surveillance. *Who* 8.
- 908 Pader V, Hakim S, Painter KL, Wigneshweraraj S, Clarke TB, Edwards AM. 2016.  
909 *Staphylococcus aureus* inactivates daptomycin by releasing membrane  
910 phospholipids. *Nature Microbiology* **2**. doi:10.1038/nmicrobiol.2016.194
- 911 Peschel A, Otto M, Jack RW, Kalbacher H, Jung G, Götz F. 1999. Inactivation of the *dlt*  
912 Operon in *Staphylococcus aureus* Confers Sensitivity to Defensins, Protegrins, and  
913 Other Antimicrobial Peptides. *J Biol Chem* **274**:8405–8410.
- 914 Phaneuf PV, Gosting D, Palsson BO, Feist AM. 2018. ALEdb 1.0: a database of  
915 mutations from adaptive laboratory evolution experimentation. *Nucleic Acids Res*  
916 1–8.
- 917 Podolsky SH. 2018. The evolving response to antibiotic resistance (1945–2018).  
918 *Palgrave Communications* **4**:1–8.
- 919 Pollack LA, Srinivasan A. 2014. Core elements of hospital antibiotic stewardship  
920 programs from the Centers for Disease Control and Prevention. *Clin Infect Dis* **59**  
921 **Suppl 3**:S97–100.
- 922 Poudel S, Tsunemoto H, Seif Y, Sastry AV, Szubin R, Xu S, Machado H, Olson C,  
923 Anand A, Pogliano J, Nizet V, Palsson B. 2020. Revealing 29 sets of independently  
924 modulated genes in *Staphylococcus aureus*, their regulators and role in key  
925 physiological responses. *bioRxiv*. doi:10.1101/2020.03.18.997296

- 926 Read TD, Petit RA 3rd, Yin Z, Montgomery T, McNulty MC, David MZ. 2018. USA300  
927 *Staphylococcus aureus* persists on multiple body sites following an infection. *BMC*  
928 *Microbiol* **18**:206.
- 929 Sabat AJ, Tinelli M, Grundmann H, Akkerboom V, Monaco M, Del Grosso M, Errico G,  
930 Pantosti A, Friedrich AW. 2018. Daptomycin Resistant *Staphylococcus aureus*  
931 Clinical Strain With Novel Non-synonymous Mutations in the *mprF* and *vraS*  
932 Genes: A New Insight Into Daptomycin Resistance. *Front Microbiol* **9**:2705.
- 933 Sakoulas G, Eliopoulos GM, Moellering RC Jr, Wennersten C, Venkataraman L, Novick  
934 RP, Gold HS. 2002. Accessory gene regulator (*agr*) locus in geographically diverse  
935 *Staphylococcus aureus* isolates with reduced susceptibility to vancomycin.  
936 *Antimicrob Agents Chemother* **46**:1492–1502.
- 937 Salazar MJ, Machado H, Dillon NA, Tsunemoto H, Szubin R, Dahesh S, Pogliano J,  
938 Sakoulas G, Palsson BO, Nizet V, Feist AM. 2020. Genetic Determinants Enabling  
939 Medium-Dependent Adaptation to Nafcillin in Methicillin-Resistant *Staphylococcus*  
940 *aureus*. *mSystems*. doi:10.1128/msystems.00828-19
- 941 Shore AC, Brennan OM, Ehricht R, Monecke S, Schwarz S, Slickers P, Coleman DC.  
942 2010. Identification and Characterization of the Multidrug Resistance Gene *cfr* in a  
943 Panton-Valentine Leukocidin-Positive Sequence Type 8 Methicillin-Resistant  
944 *Staphylococcus aureus* IVa (USA300) Isolate. *Antimicrobial Agents and*  
945 *Chemotherapy*. doi:10.1128/aac.01113-10
- 946 Sieradzki K, Tomasz A. 1999. Gradual Alterations in Cell Wall Structure and Metabolism  
947 in Vancomycin-Resistant Mutants of *Staphylococcus aureus*. *J Bacteriol* **181**:7566–  
948 7570.



- 949 Sorrell TC, Packham DR, Shanker S, Foldes M, Munro R. 1982. Vancomycin therapy  
950 for methicillin-resistant *Staphylococcus aureus*. *Ann Intern Med* **97**:344–350.
- 951 Strahl H, Hamoen LW. 2010. Membrane potential is important for bacterial cell division.  
952 *Proc Natl Acad Sci U S A* **107**:12281–12286.
- 953 Tran PM, Feiss M, Kinney KJ, Salgado-Pabón W. 2019.  $\phi$ Sa3mw Prophage as a  
954 Molecular Regulatory Switch of *Staphylococcus aureus*  $\beta$ -Toxin Production. *J*  
955 *Bacteriol* **201**. doi:10.1128/JB.00766-18
- 956 (u.s.) CFDCAP, Centers for Disease Control and Prevention (U.S.). 2019. Antibiotic  
957 resistance threats in the United States, 2019. doi:10.15620/cdc:82532
- 958 van Wamel WJB, Rooijackers SHM, Ruyken M, van Kessel KPM, van Strijp JAG. 2006.  
959 The Innate Immune Modulators Staphylococcal Complement Inhibitor and  
960 Chemotaxis Inhibitory Protein of *Staphylococcus aureus* Are Located on -  
961 Hemolysin-Converting Bacteriophages. *Journal of Bacteriology*.  
962 doi:10.1128/jb.188.4.1310-1315.2006
- 963 Verkaik NJ, Benard M, Boelens HA, de Vogel CP, Nouwen JL, Verbrugh HA, Melles  
964 DC, van Belkum A, van Wamel WJB. 2011. Immune evasion cluster-positive  
965 bacteriophages are highly prevalent among human *Staphylococcus aureus* strains,  
966 but they are not essential in the first stages of nasal colonization. *Clinical*  
967 *Microbiology and Infection*. doi:10.1111/j.1469-0691.2010.03227.x
- 968 Vidailiac C, Gardete S, Tewhey R, Sakoulas G, Kaatz GW, Rose WE, Tomasz A, Rybak  
969 MJ. 2013. Alternative mutational pathways to intermediate resistance to  
970 vancomycin in methicillin-resistant *Staphylococcus aureus*. *J Infect Dis* **208**:67–74.
- 971 Villanueva M, García B, Valle J, Rapún B, Ruiz de Los Mozos I, Solano C, Martí M,

- 972 Penadés JR, Toledo-Arana A, Lasa I. 2018. Sensory deprivation in *Staphylococcus*  
973 *aureus*. *Nat Commun* **9**:523.
- 974 Wang QM, Peery RB, Johnson RB, Alborn WE, Yeh WK, Skatrud PL. 2001.  
975 Identification and characterization of a monofunctional glycosyltransferase from  
976 *Staphylococcus aureus*. *J Bacteriol* **183**:4779–4785.
- 977 Xia G, Wolz C. 2014. Phages of *Staphylococcus aureus* and their impact on host  
978 evolution. *Infect Genet Evol* **21**:593–601.
- 979

**Table S1** - Minimum inhibitory concentration (MIC<sub>90</sub>) of *S. aureus* starting strains and TALE-derived strains in the same environmental conditions used for tolerance evolution, CA-MHB or RPMI+. Post-TALE refers to the MIC<sub>90</sub> of the population after  $21.79 \pm 2.08$  passages ( $9.41 \times 10^{11} \pm 9.84 \times 10^{10}$  CCDs) in the media used for evolution, without vancomycin. The post-TALE evolution was performed in duplicate for each of the end-point clones.

| Strain   | MIC <sub>90</sub> (µg/mL) in CA-MHB |           | Strain   | MIC <sub>90</sub> (µg/mL) in RPMI+ |            |
|----------|-------------------------------------|-----------|----------|------------------------------------|------------|
|          | Starting strain / TALE              | post-TALE |          | Starting strain / TALE             | post-TALE  |
| WT       | 1                                   | -         | WT       | 2                                  | -          |
| SVAM_A2  | 4                                   | ND        | SVAR_A1  | 4                                  | ND         |
| SVAM_A3  | 8                                   | 4 / 4     | SVAR_A2  | 8-16                               | 8 / 8      |
| STM2     | 1                                   | -         | SVAR_A3  | 16                                 | 16 / 16    |
| SVAM_A6  | 4-8                                 | 2-4 / 4   | SVAR_A10 | 8                                  | ND         |
| SVAM_A7  | 8                                   | 4 / 4     | STR1     | 2                                  | -          |
| SVAM_A8  | 4                                   | ND        | SVAR_A4  | 8-16                               | 8 / 8      |
| STM3     | 1                                   | -         | SVAR_A5  | 8-16                               | 8-16 / 8   |
| SVAM_A9  | 8                                   | 4 / 4     | SVAR_A11 | 8                                  | ND         |
| SVAM_A10 | 8                                   | 2 / 2     | STR4     | 4                                  | -          |
| SVAM_A11 | 4                                   | ND        | SVAR_A7  | 8-16                               | 8 -16 / 16 |
| SVAM_A12 | 8                                   | 4 / 4     | SVAR_A8  | 8                                  | ND         |
|          |                                     |           | SVAR_A12 | 8                                  | 8 / 8      |

**Figure S1** – Characteristics of vancomycin TALE strains. (A) An image of a plate displaying hemolytic activity after 24 h incubation at 37 °C for starting strains and vancomycin TALE strains (B) Autolysis of whole cells of *S. aureus*. Mid-exponential-phase cultures were resuspended in 0.05 M Tris-HCl (pH 7.2) containing 0.05% Triton X-100 and were incubated at 30°C. Absorbance was measured every hour and percentage to initial absorbance calculated.

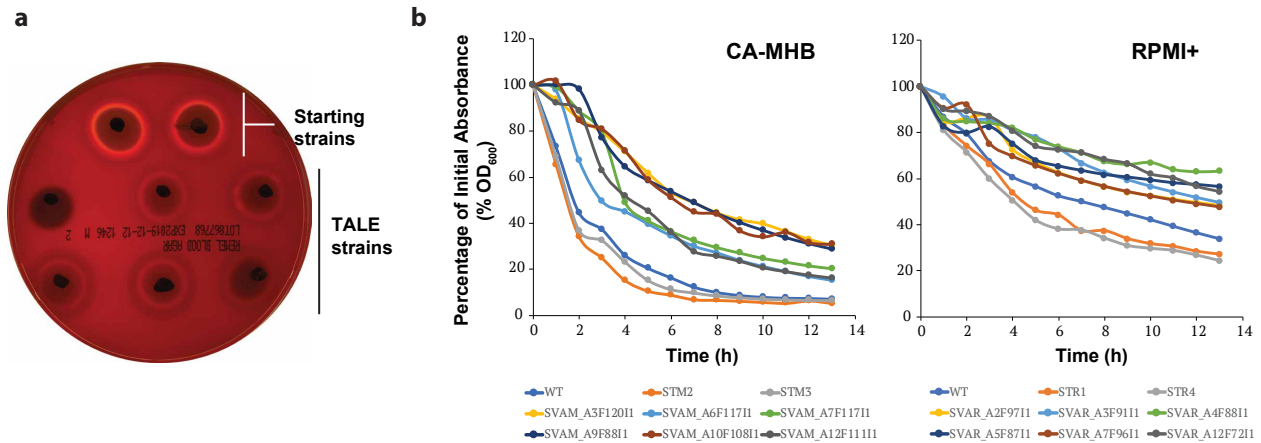

**Table S2** – ANOVA statistical analysis of the lag-phase duration of starting strains and evolved strains in the same media as that used for tolerization.

| vancomycin.ug.ml | Starting_strain | F.value          | Pr..F.               |
|------------------|-----------------|------------------|----------------------|
| 0                | STM2            | 4.37324747923248 | 0.062998644983095    |
| 0                | STM3            | 8.21404843584888 | 0.0132439301947123   |
| 0                | STR1            | 55.9776079042055 | 2.10636199647478E-05 |
| 0                | STR4            | 18.2400821654054 | 0.00163482854999148  |
| 0.5              | STM2            | 180.845045483513 | 9.94033084285709E-08 |
| 0.5              | STM3            | 163.726248981813 | 9.6409038322023E-09  |
| 0.5              | STR1            | 355.069596153815 | 3.83918455769995E-09 |
| 0.5              | STR4            | 198.53651002671  | 6.36874197639287E-08 |
| 0                | WT(MHB)         | 533.791403846887 | 7.21720540302604E-08 |
| 0                | WT(RPMI)        | 11.7094080873006 | 0.00652657253351374  |
| 0.5              | WT(MHB)         | 499.257469737133 | 9.09544723581264E-08 |
| 0.5              | WT(RPMI)        | 5.55414886661091 | 0.0401771670140192   |

**Figure S2** – Venn diagram of the key mutated genes ( $\geq 2$  instances) in the two utilized media conditions (i.e., CA-MHB and RPMI+).

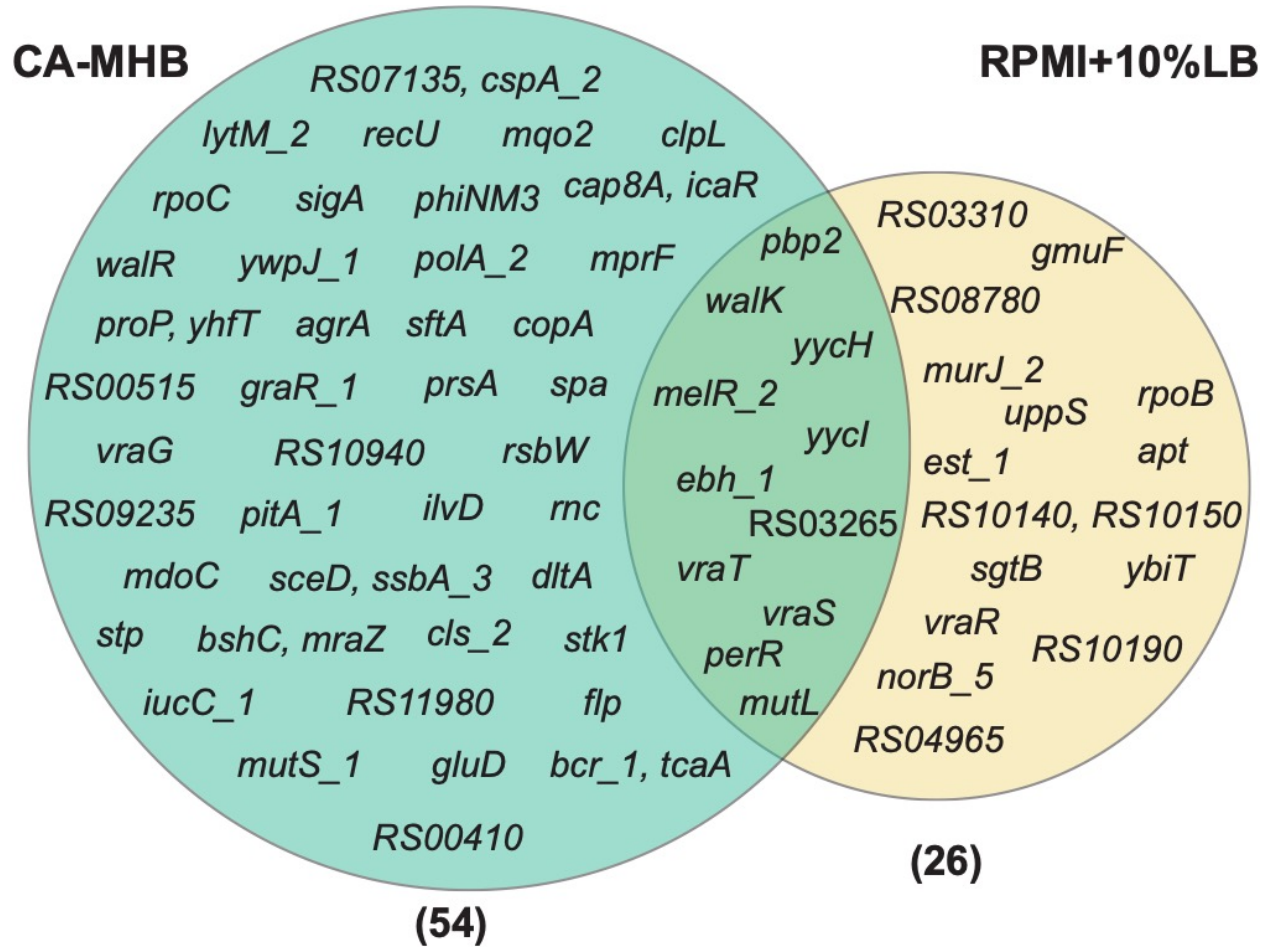

Source: https://www.biorxiv.org/content/10.1101/2020.06.07.138933v1.full.pdf
